# Supplementary material
Source: ML conference proceedings conference paper supplement (https://openreview.net/forum?id=XMzxZ6h68o)

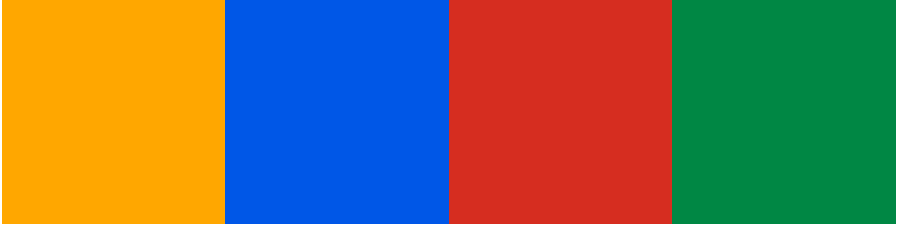

Supplement: supplementary_material [file color_scheme.pdf › QuartetSupMat/figures/color_scheme.pdf]

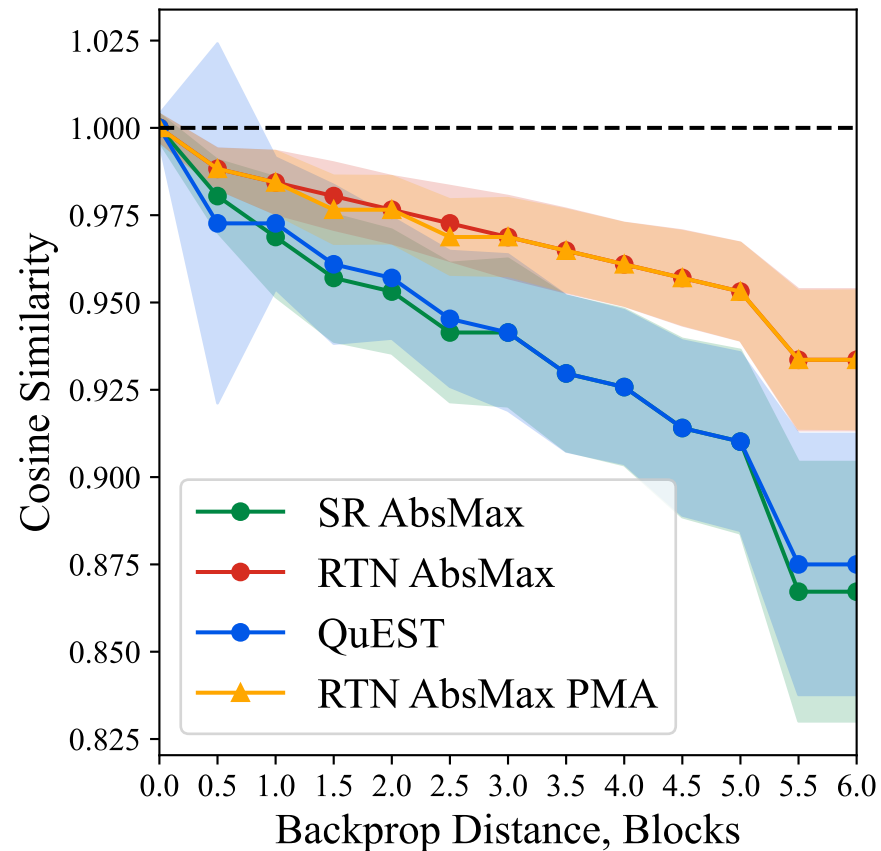

(a)

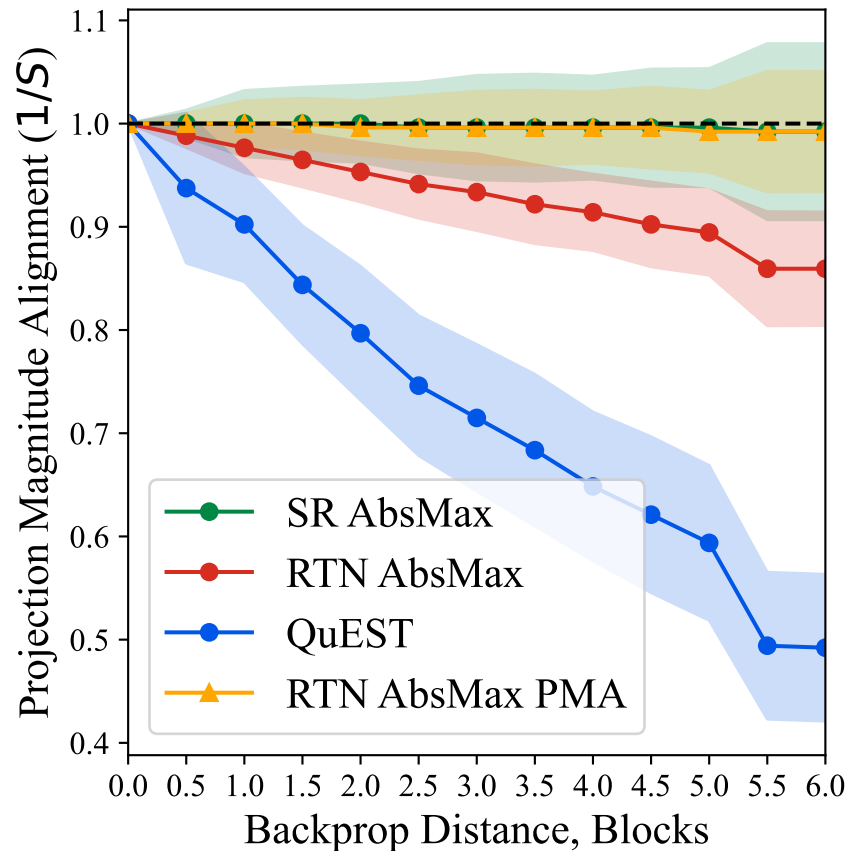

(b)

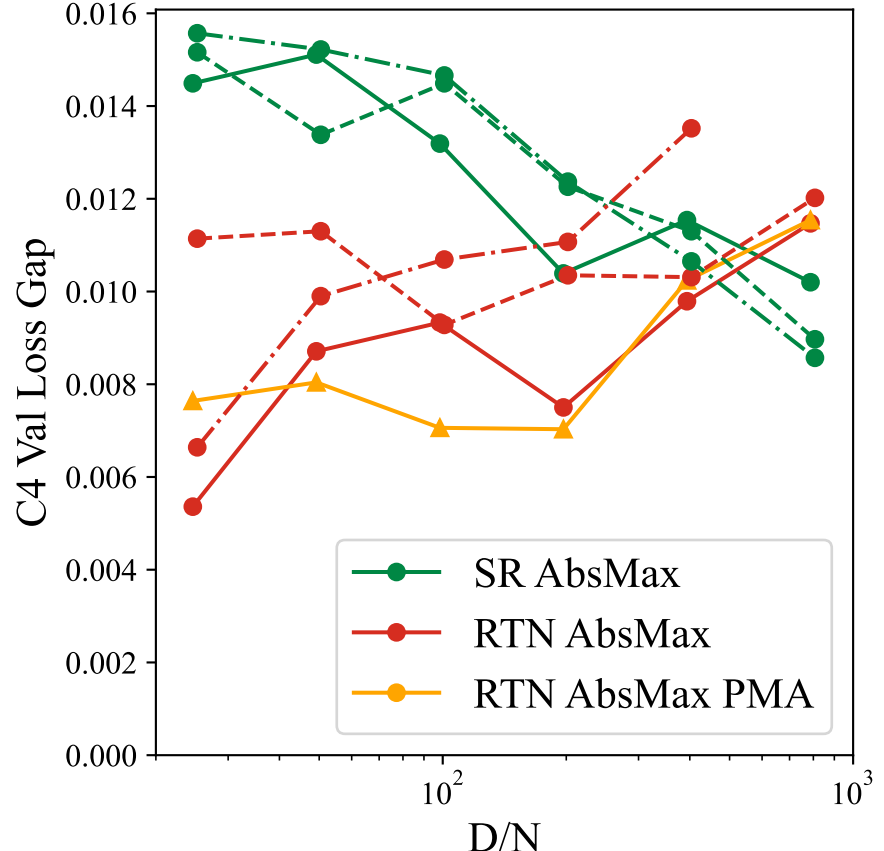

(c)

Supplement: supplementary_material [file cosine_and_alignment.pdf › QuartetSupMat/figures/cosine_and_alignment.pdf]

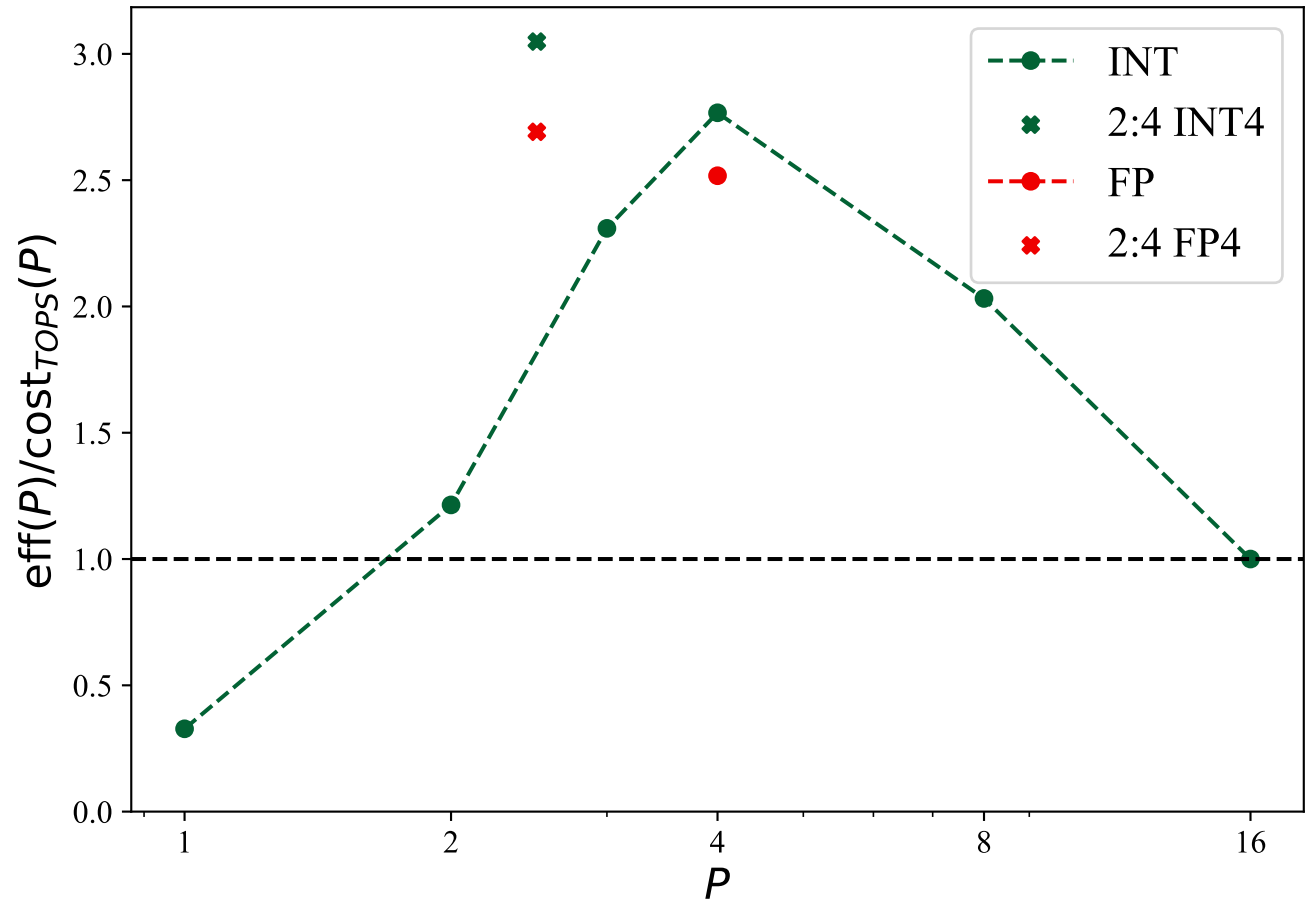

Supplement: supplementary_material [file cost_efficiencies.pdf › QuartetSupMat/figures/cost_efficiencies.pdf]

C4 Val Loss

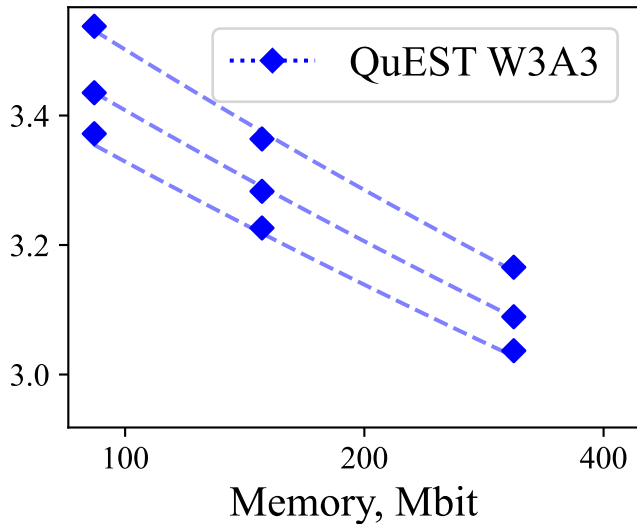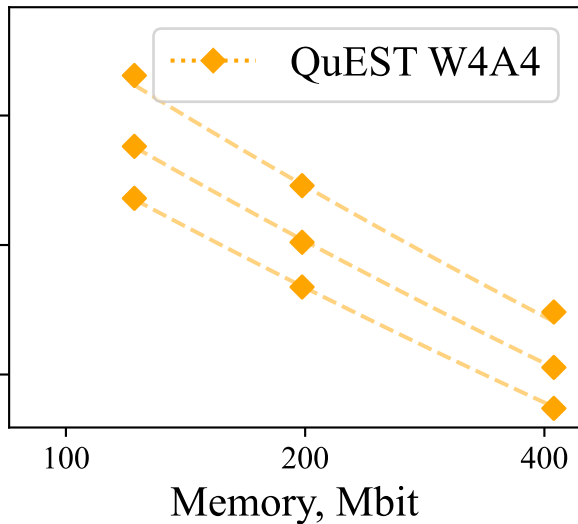

Supplement: supplementary_material [file data_fit.pdf › QuartetSupMat/figures/data_fit.pdf]

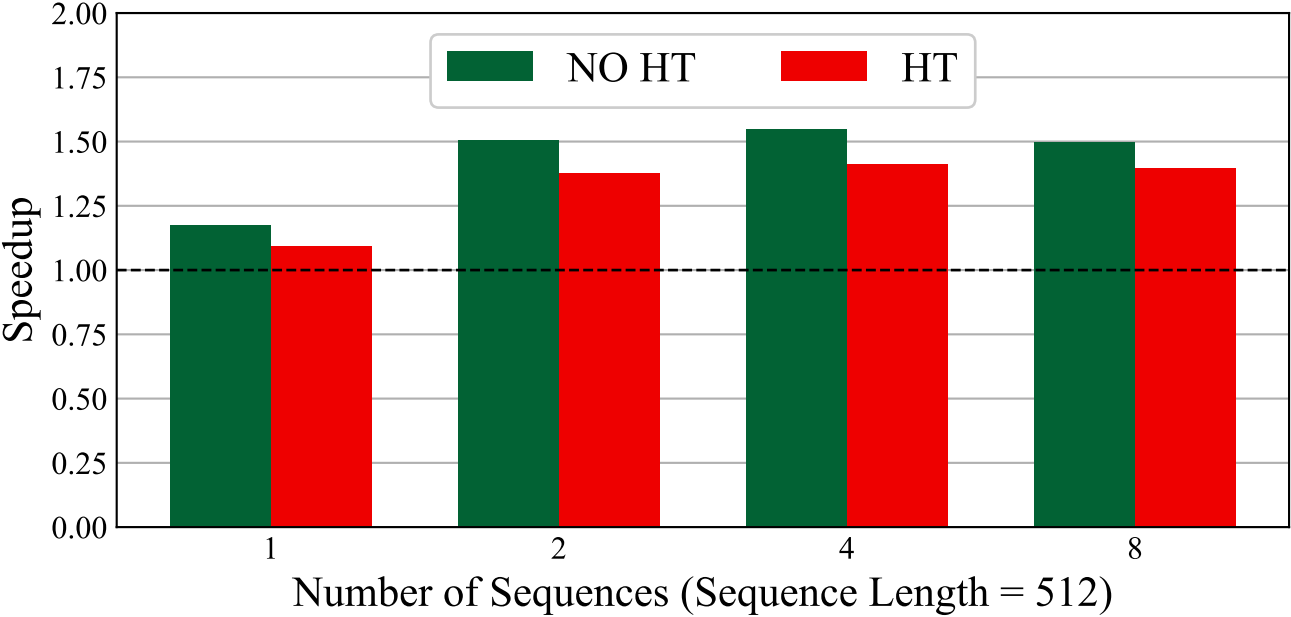

Supplement: supplementary_material [file e2e_speedup.pdf › QuartetSupMat/figures/e2e_speedup.pdf]

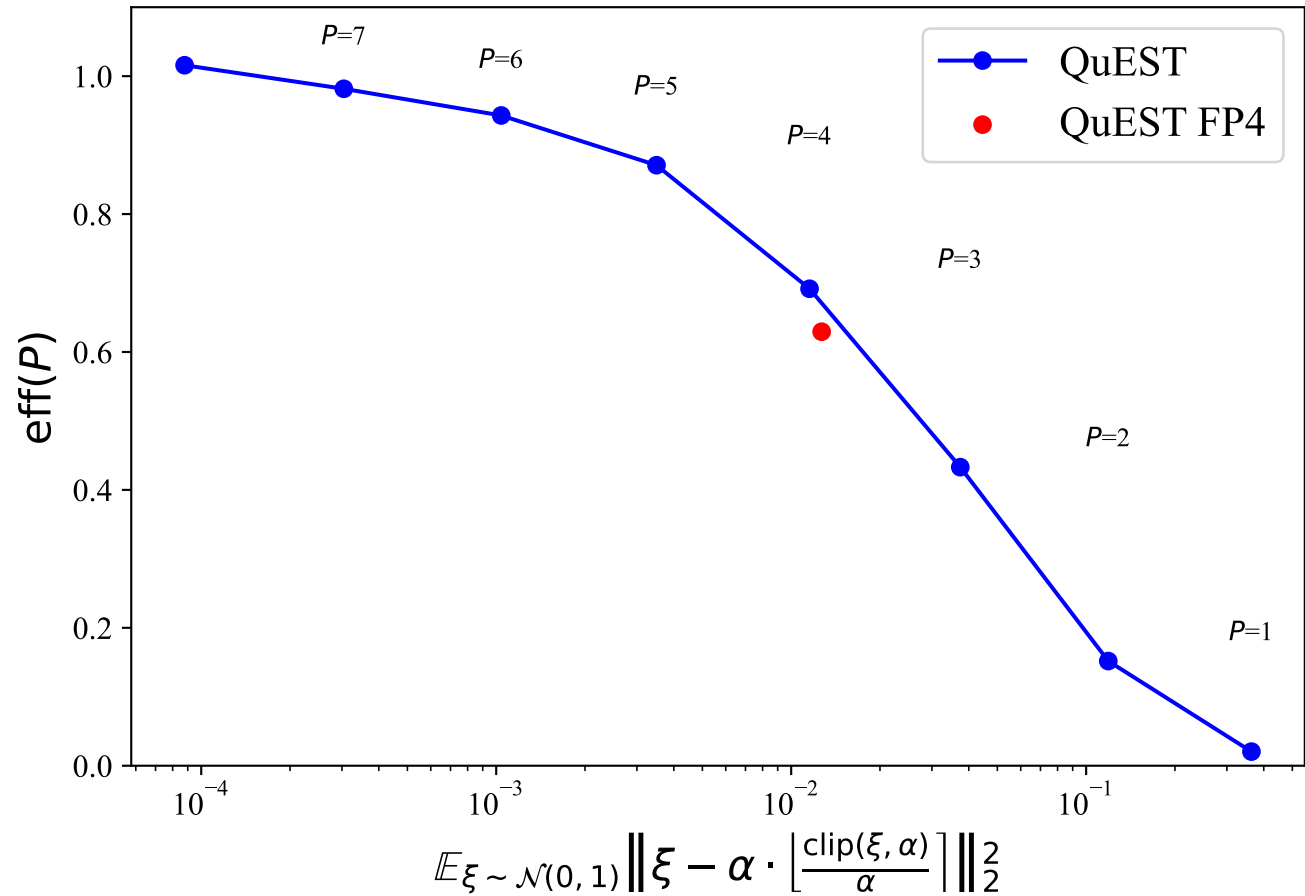

Supplement: supplementary_material [file eff_vs_err.pdf › QuartetSupMat/figures/eff_vs_err.pdf]

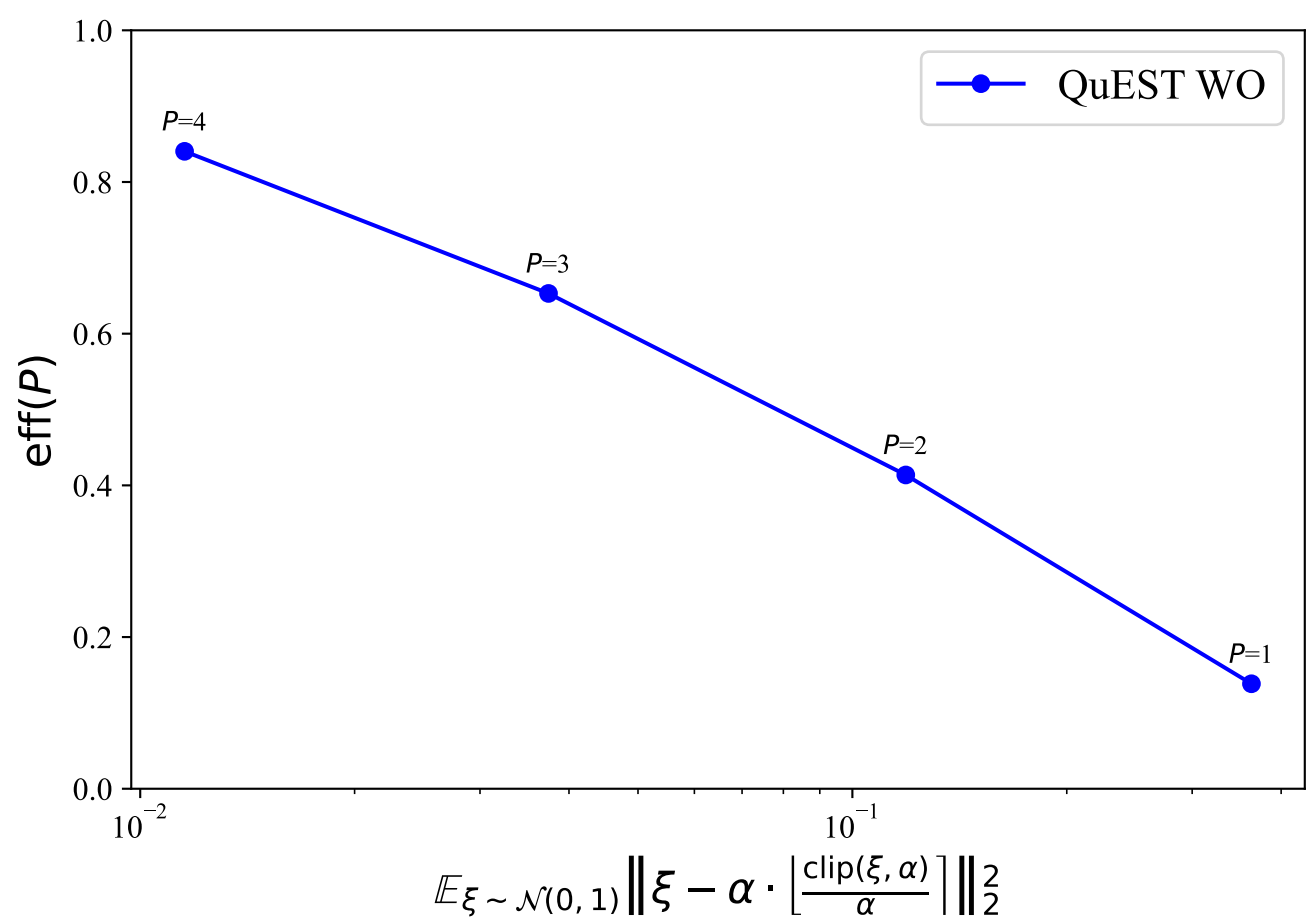

Supplement: supplementary_material [file eff_vs_err_wo.pdf › QuartetSupMat/figures/eff_vs_err_wo.pdf]

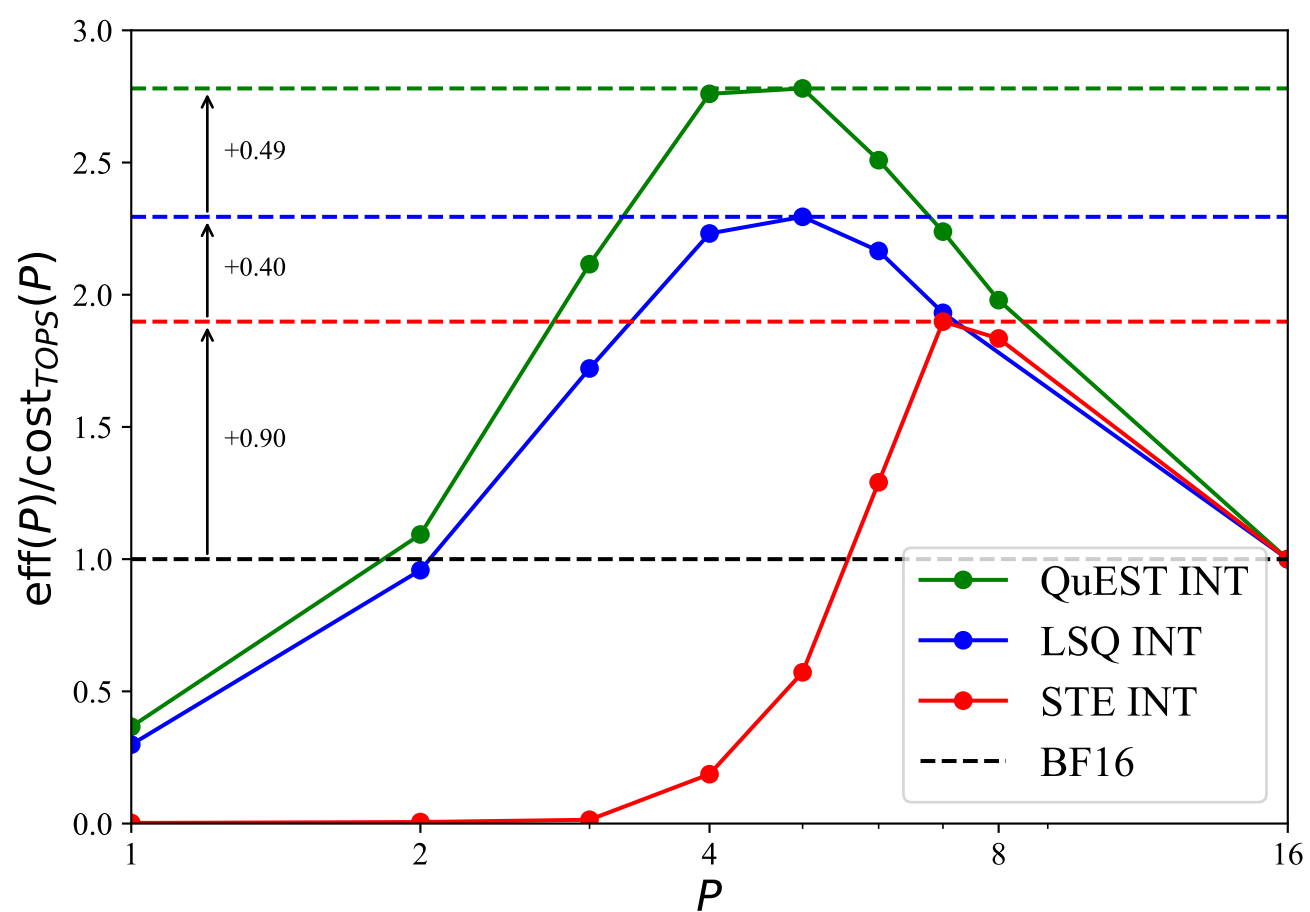

Supplement: supplementary_material [file efficiencies.pdf › QuartetSupMat/figures/efficiencies.pdf]

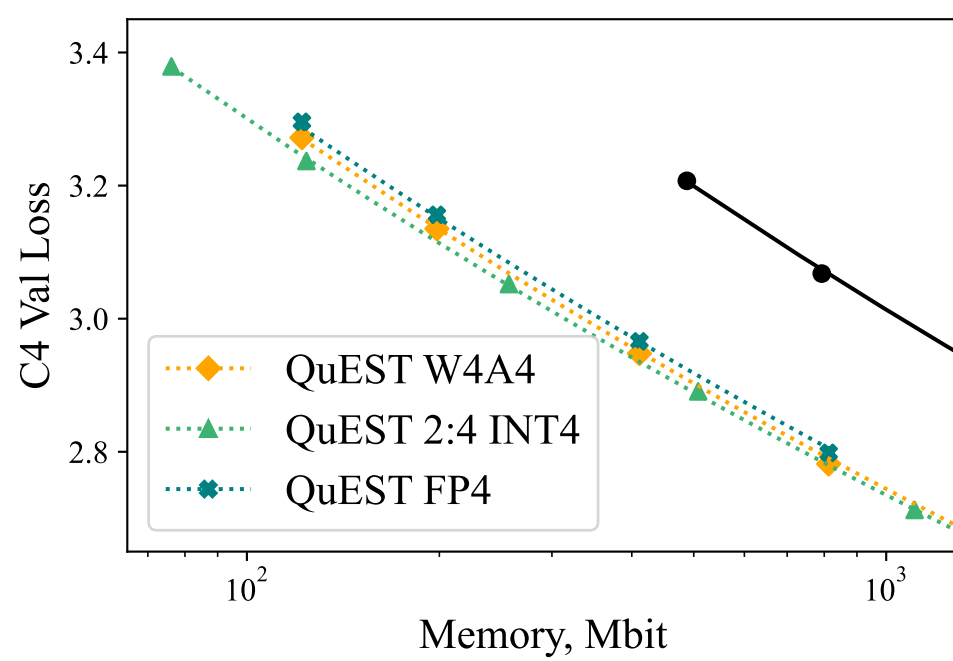

(a)

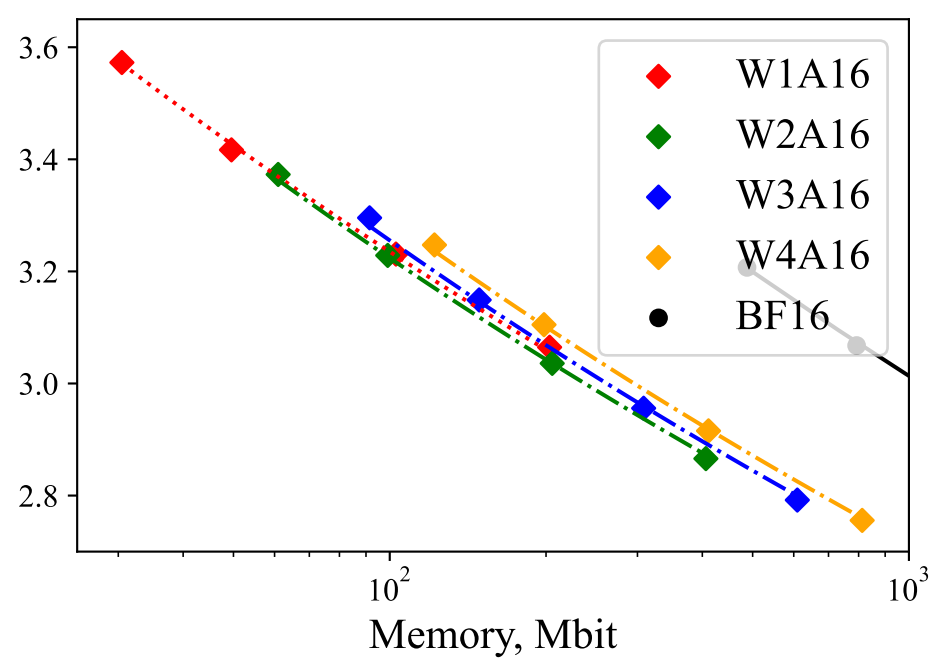

(b)

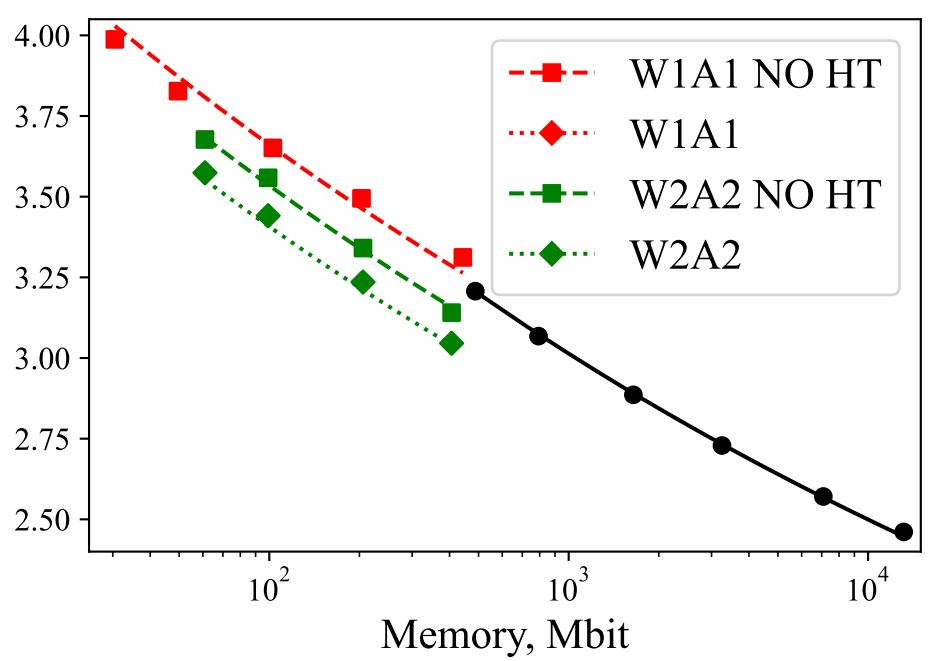

(c)

Supplement: supplementary_material [file extra.pdf › QuartetSupMat/figures/extra.pdf]

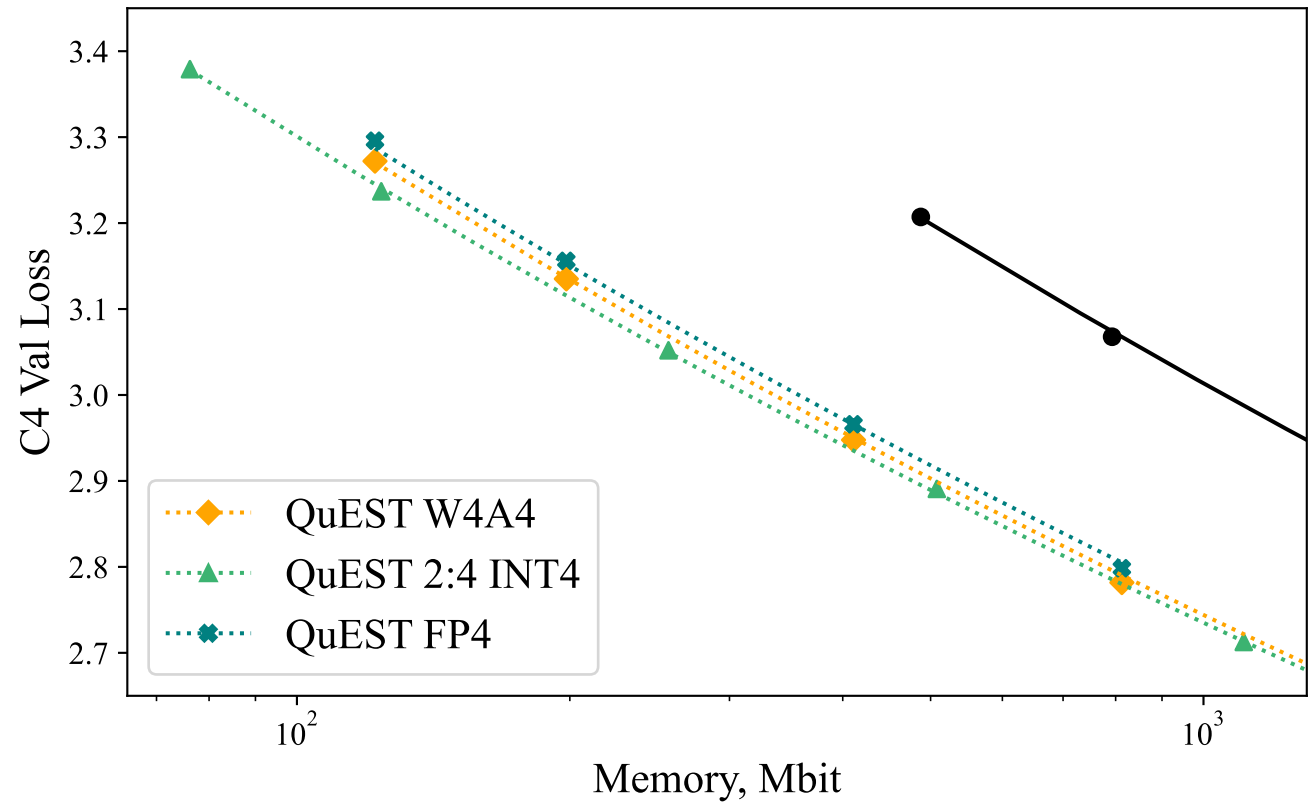

(a)

Supplement: supplementary_material [file extra1.pdf › QuartetSupMat/figures/extra1.pdf]

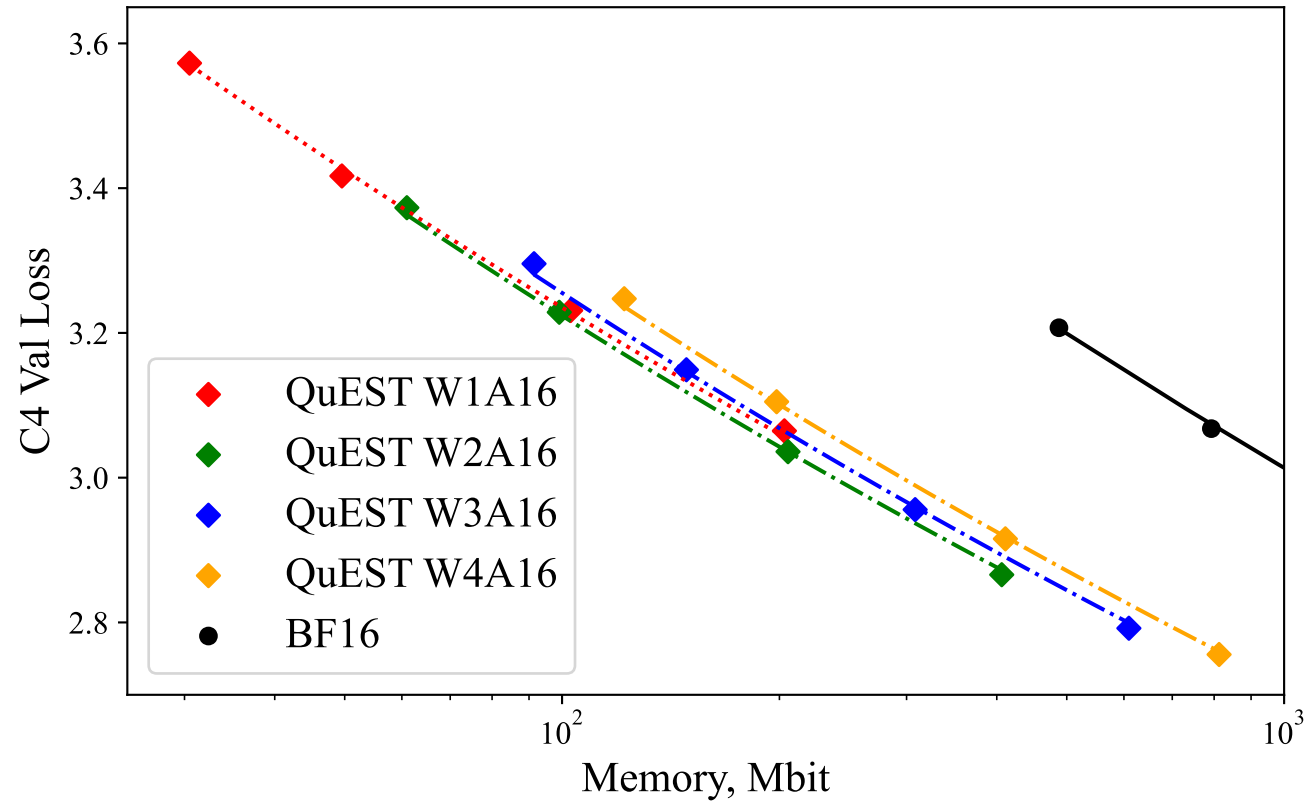

(b)

Supplement: supplementary_material [file extra2.pdf › QuartetSupMat/figures/extra2.pdf]

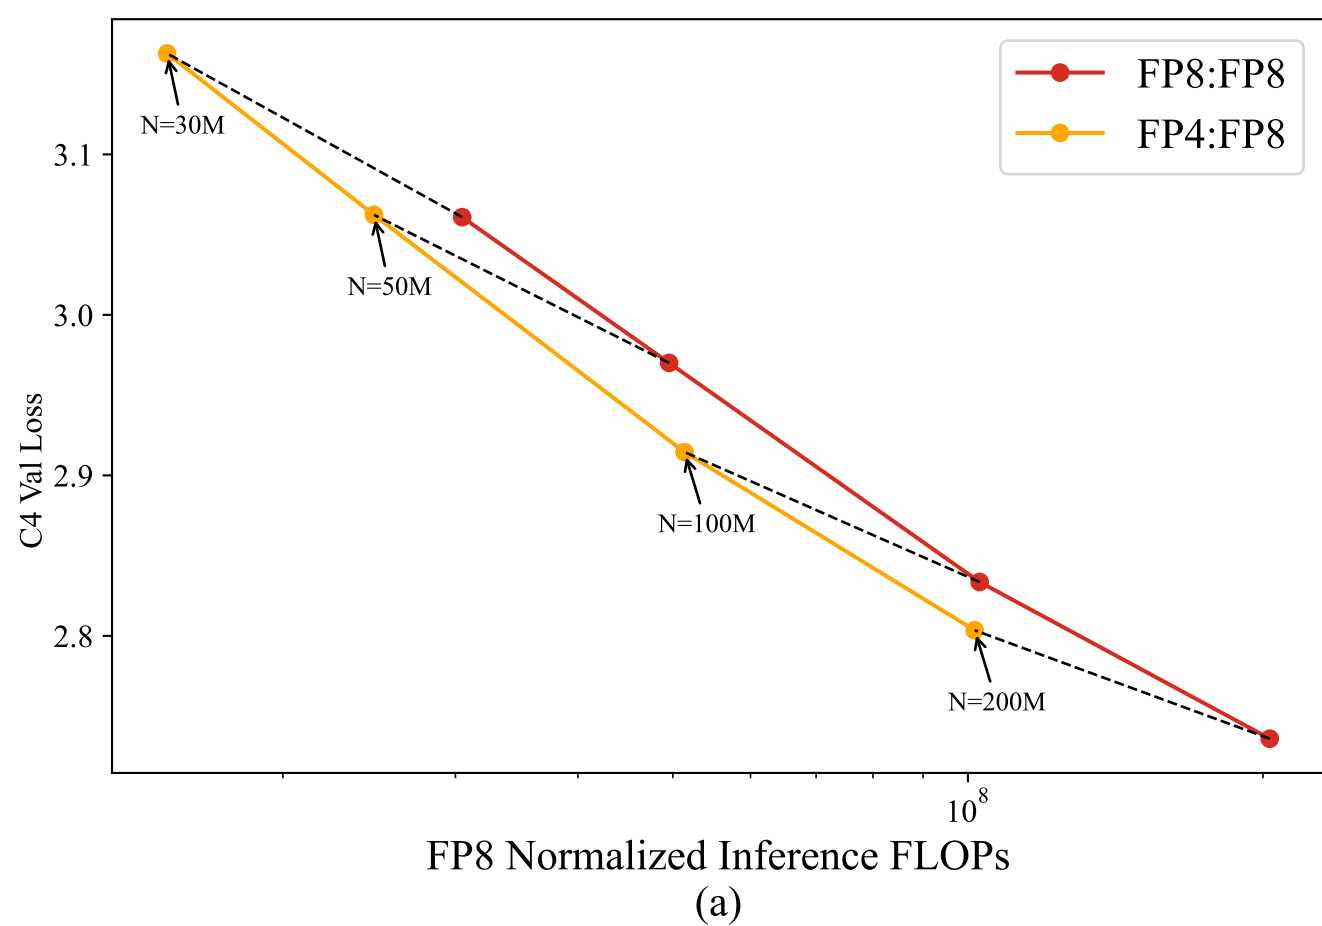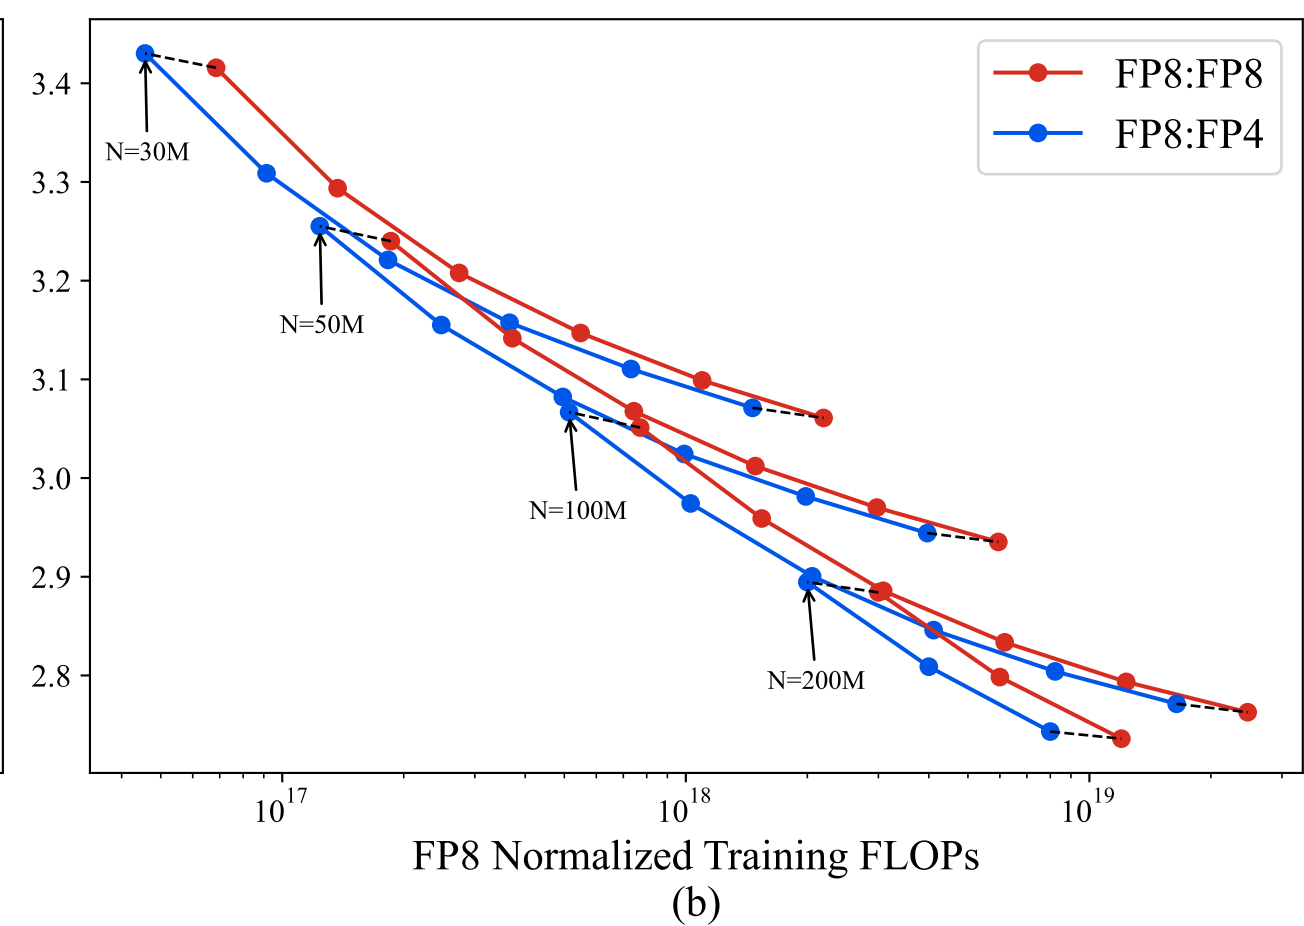

Supplement: supplementary_material [file forward_and_backward.pdf › QuartetSupMat/figures/forward_and_backward.pdf]

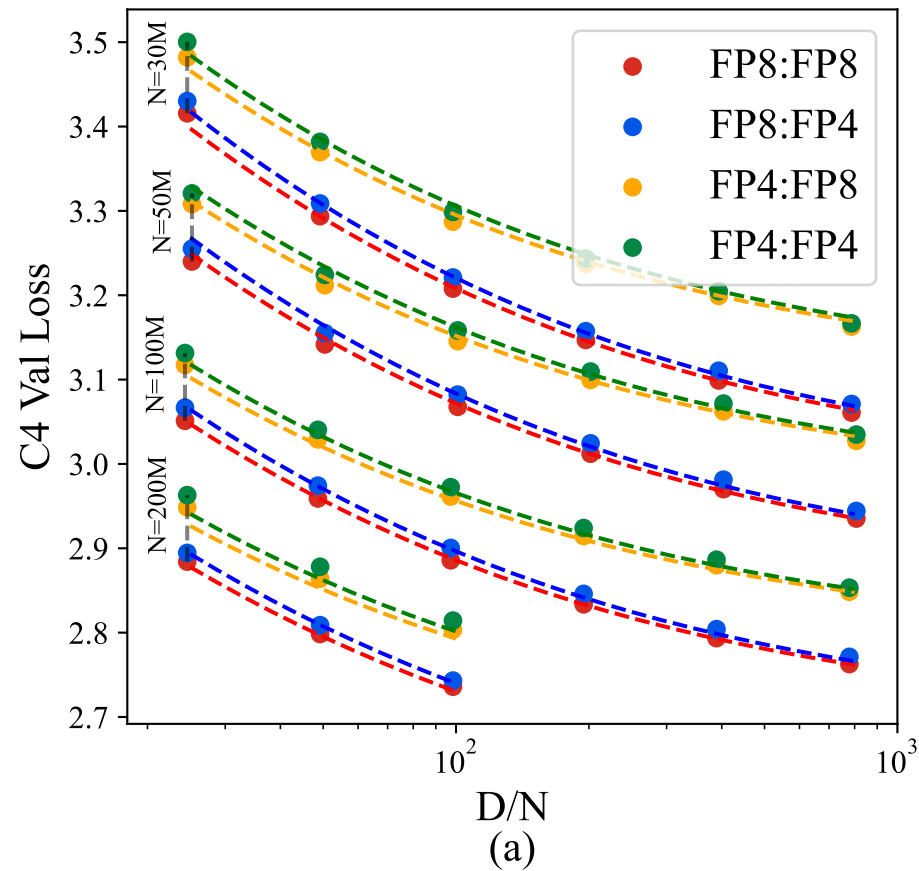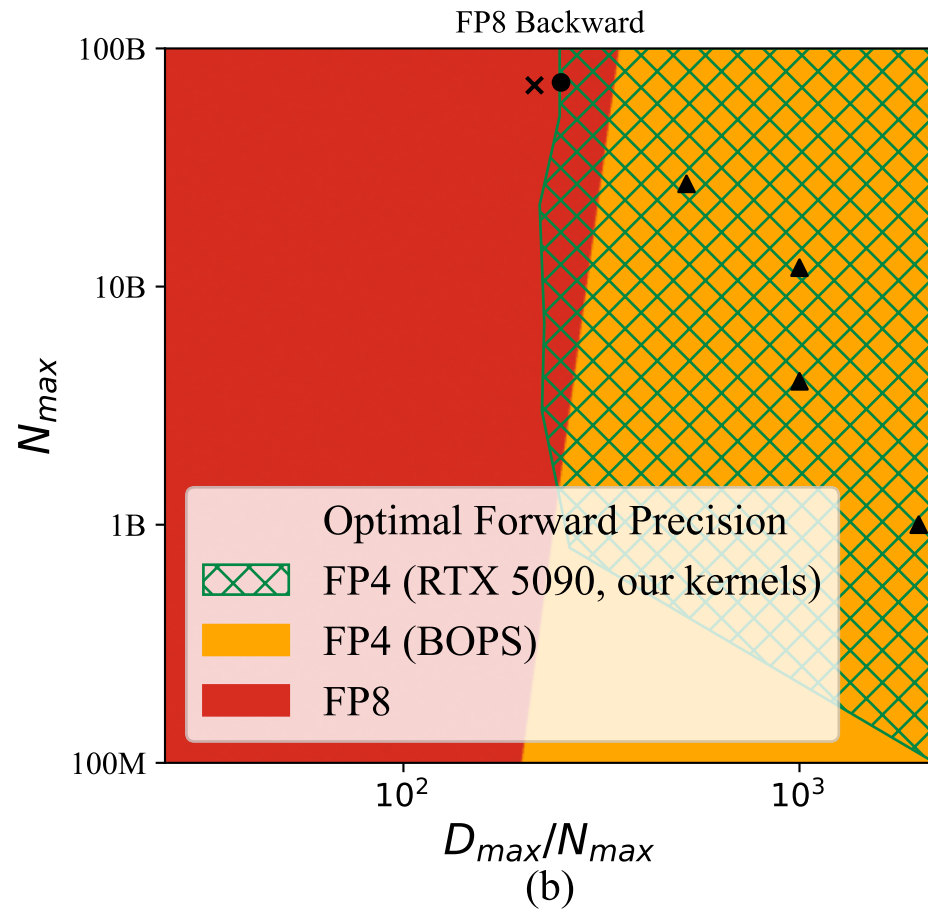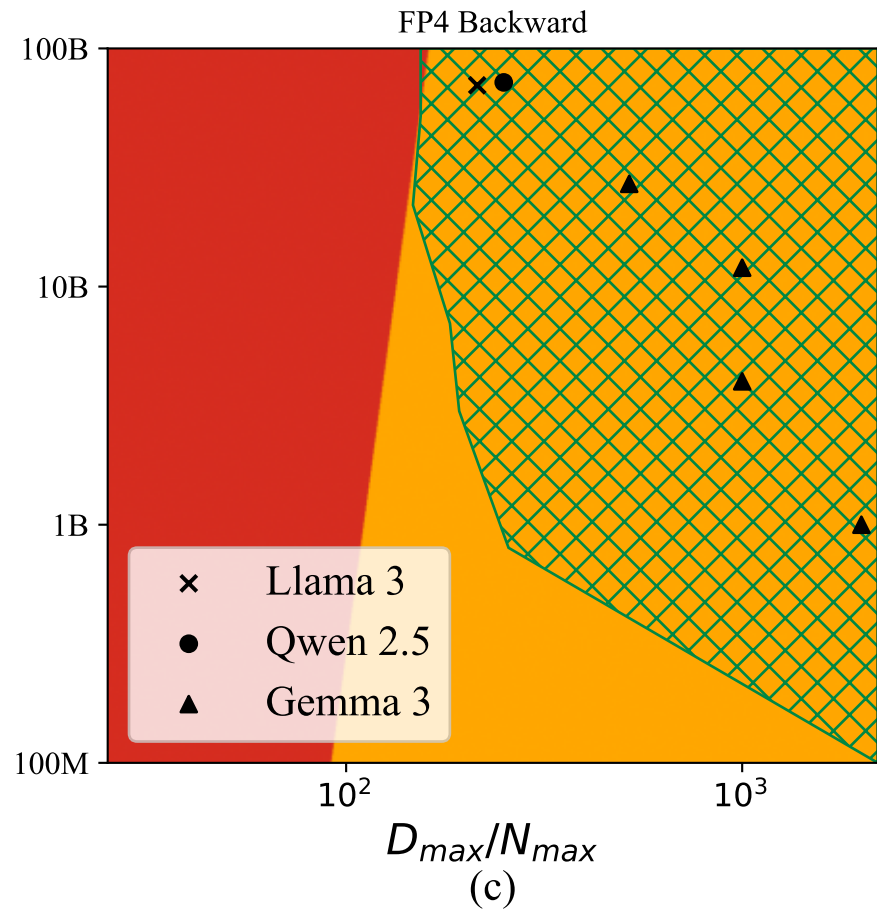

Supplement: supplementary_material [file fp4_fp8_optimal_new.pdf › QuartetSupMat/figures/fp4_fp8_optimal_new.pdf]

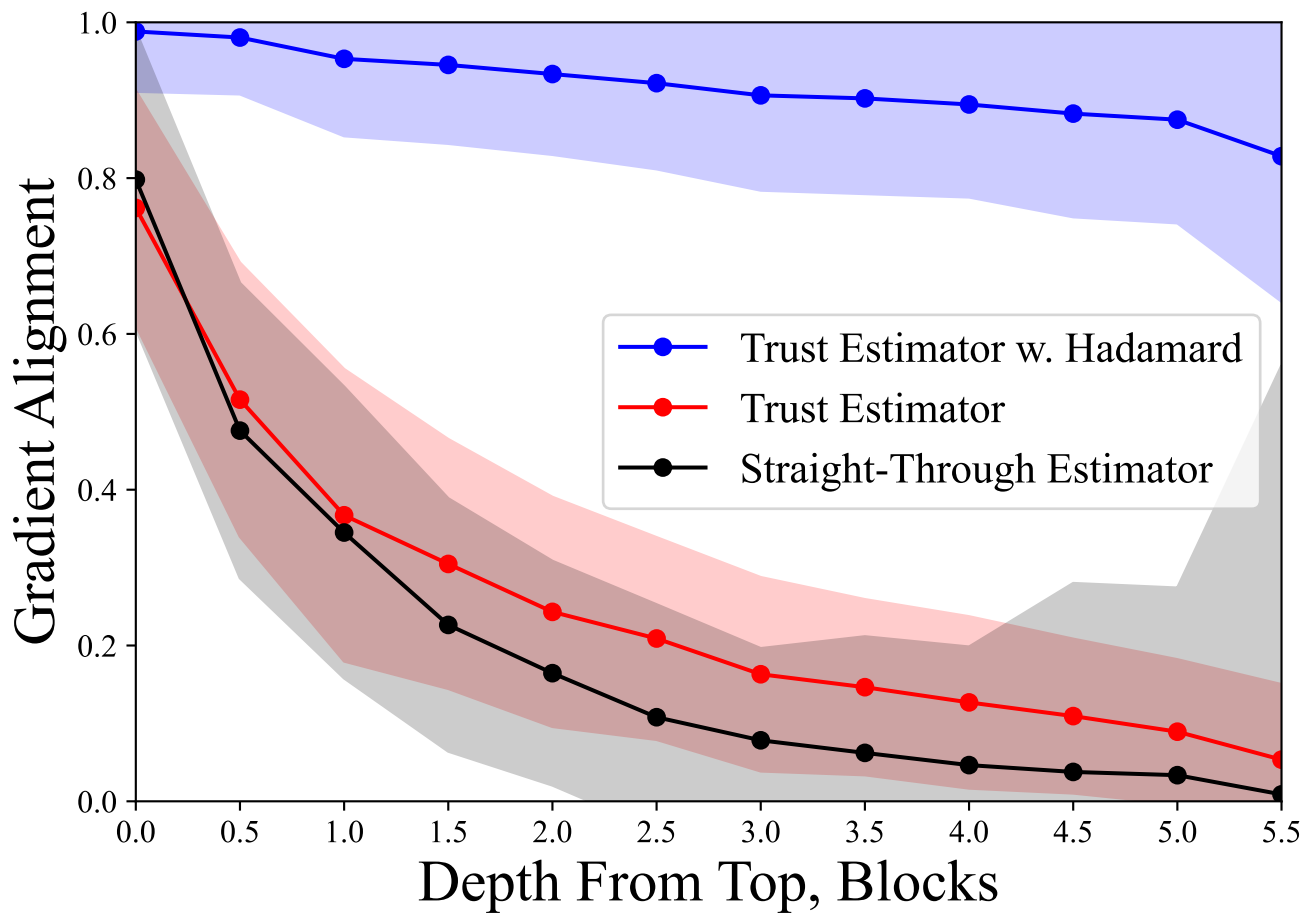

Supplement: supplementary_material [file gradient_alignment.pdf › QuartetSupMat/figures/gradient_alignment.pdf]

1.6Gb Model

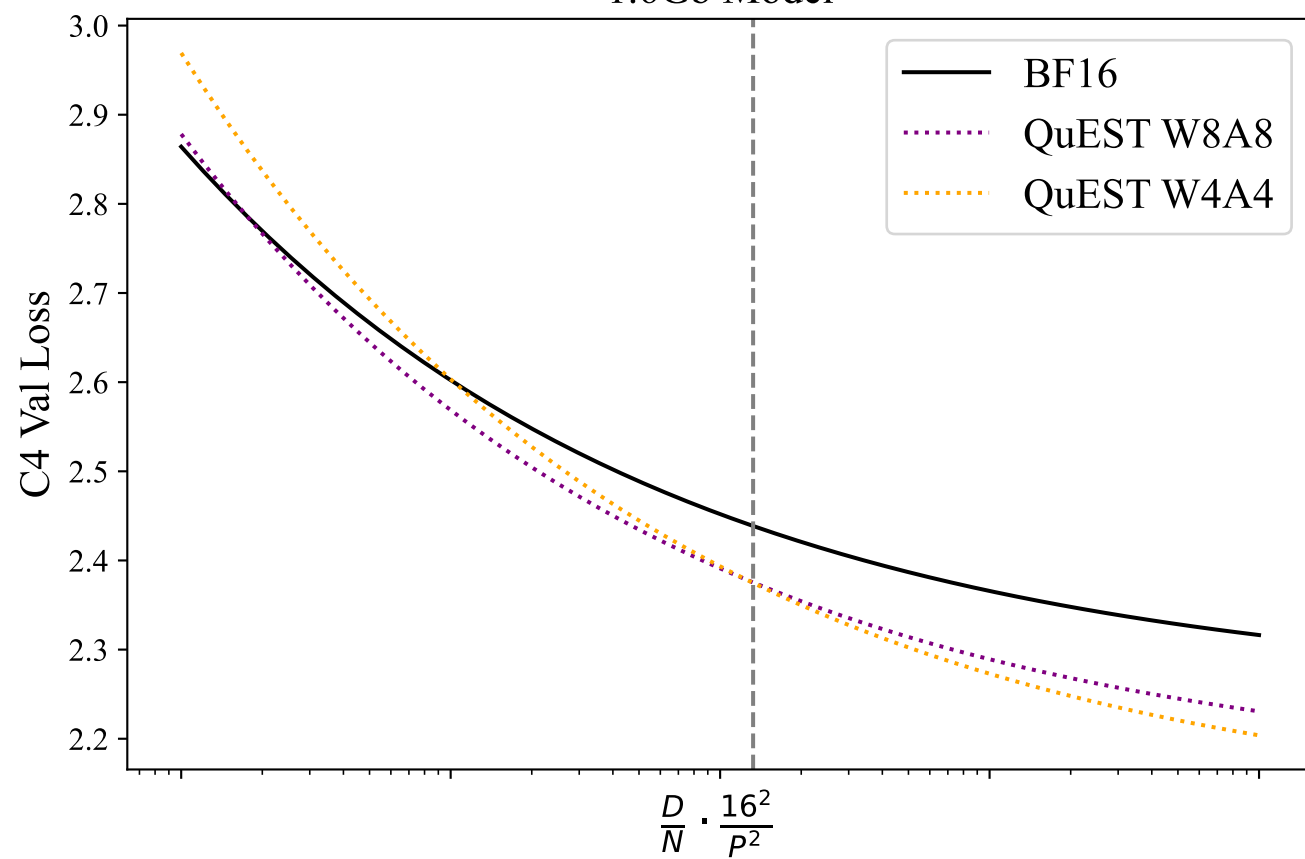

6.4Gb Model

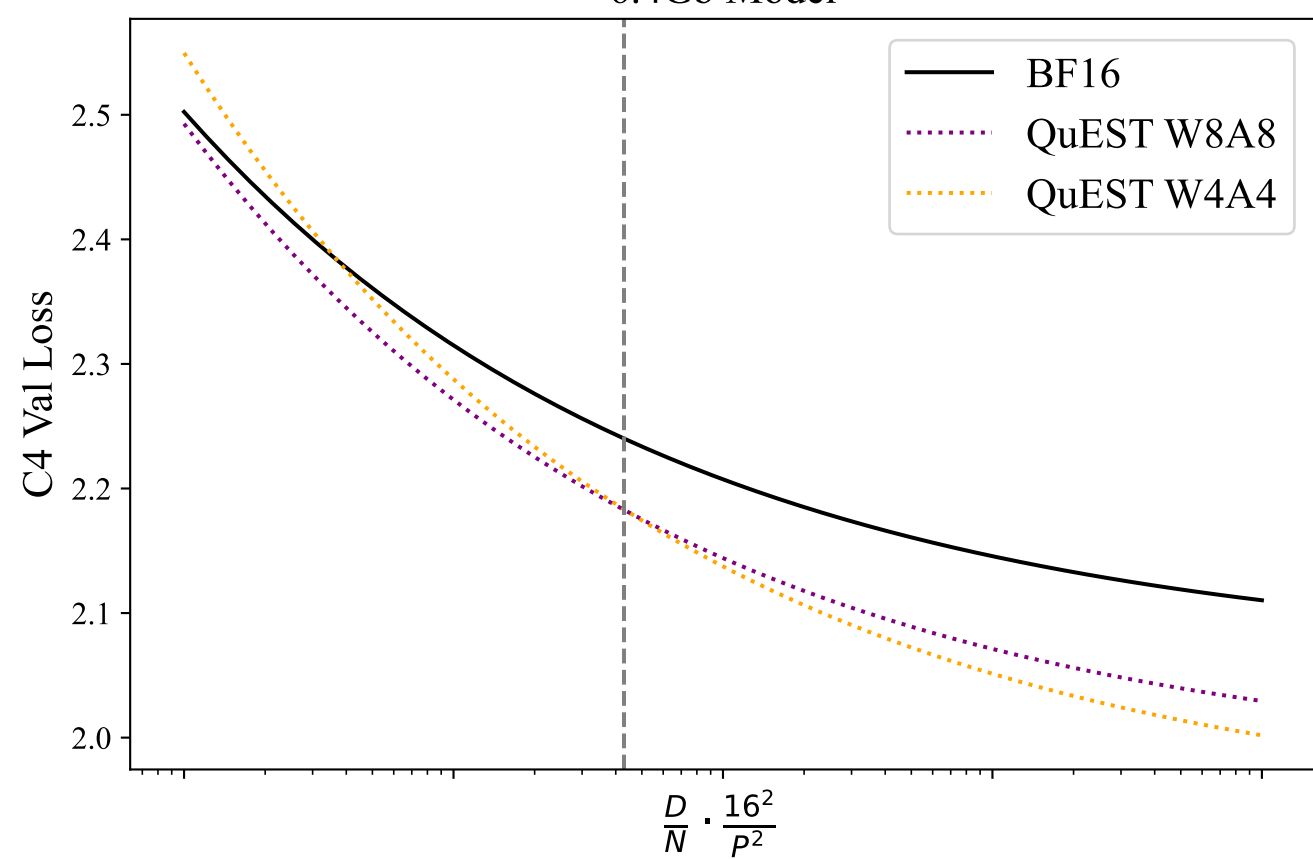

14.0Gb Model

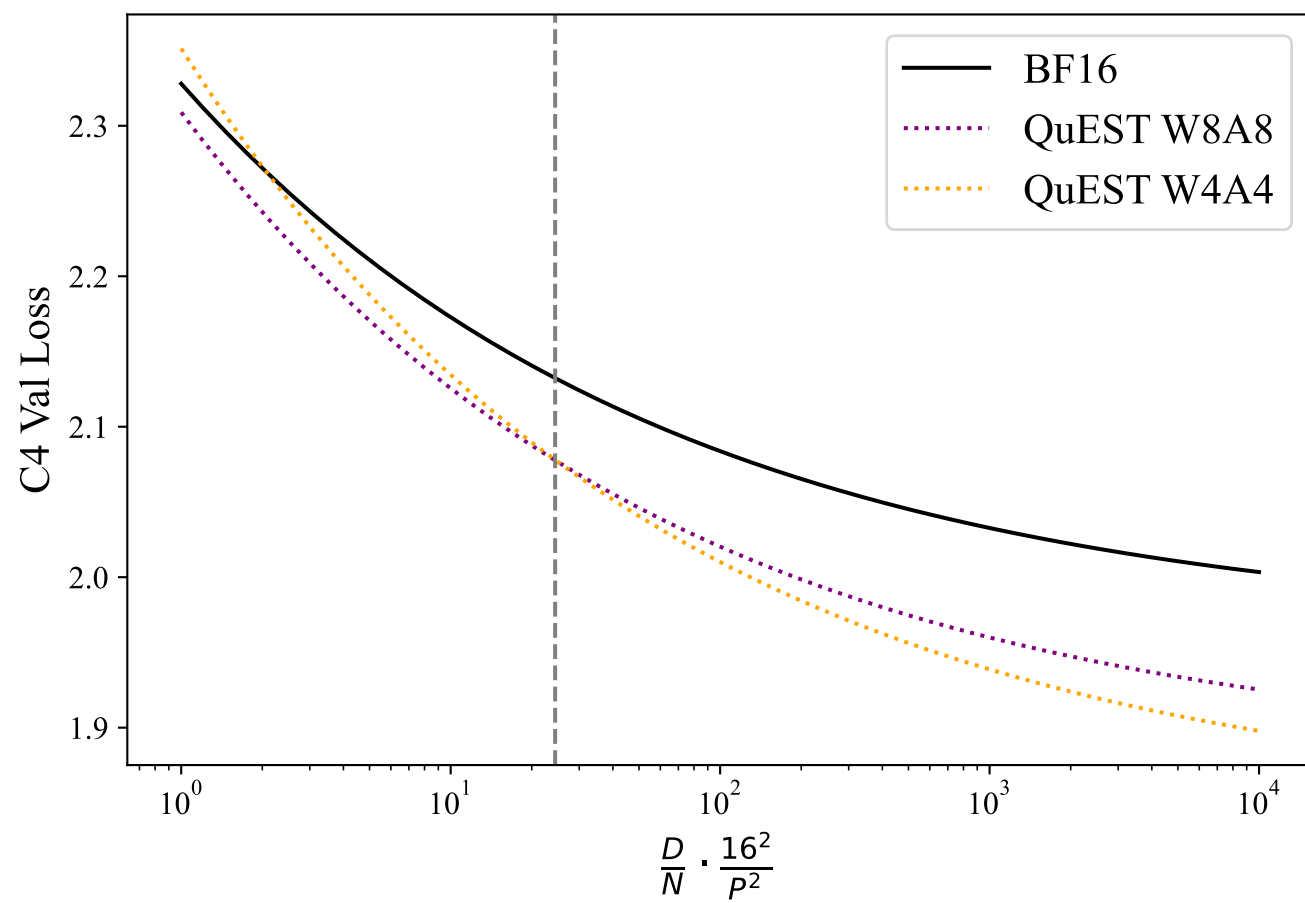

140.0Gb Model

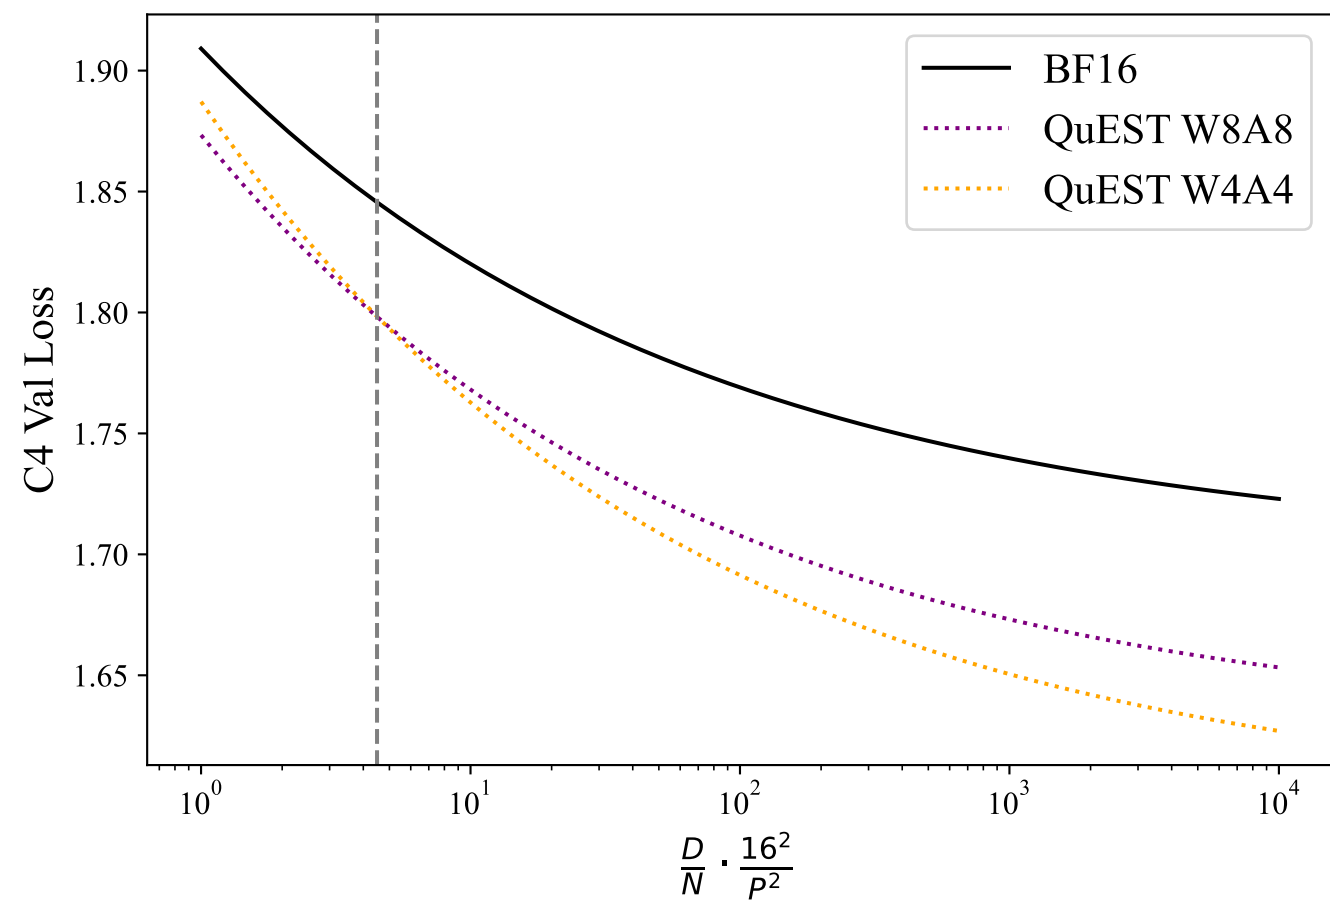

Supplement: supplementary_material [file isomem.pdf › QuartetSupMat/figures/isomem.pdf]

Main Model, Busbridge et al.

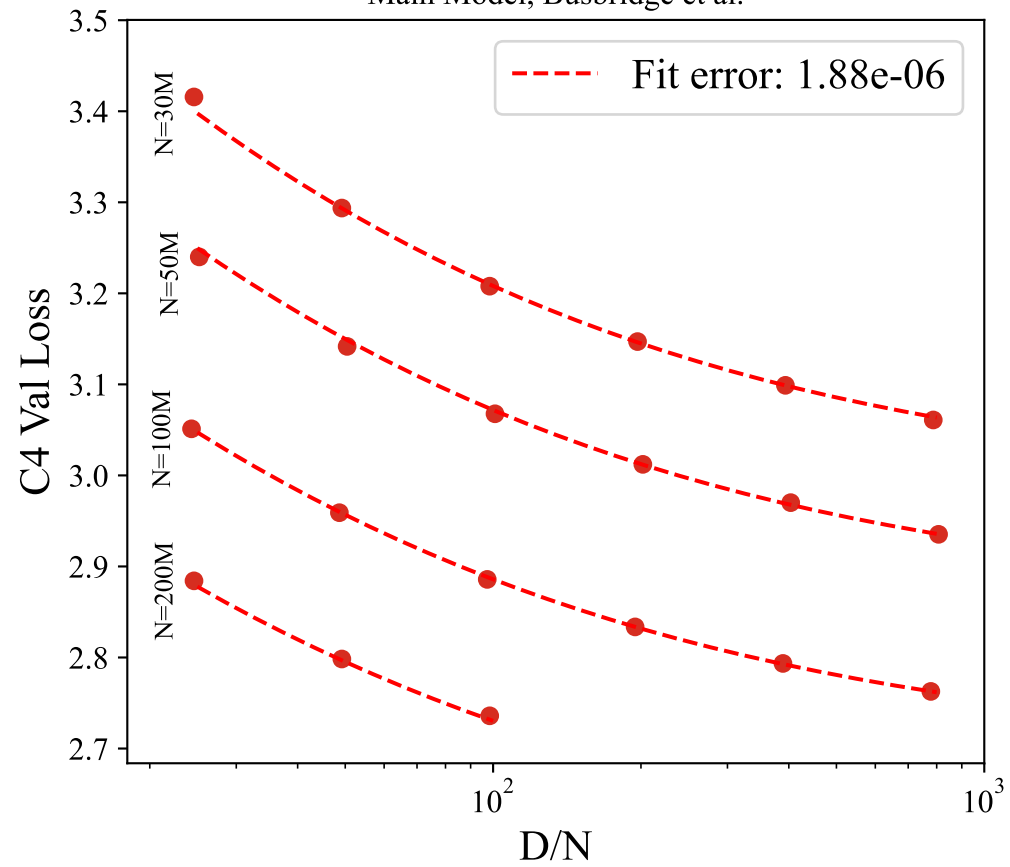 $\gamma = 1$  Model, Hoffman et al.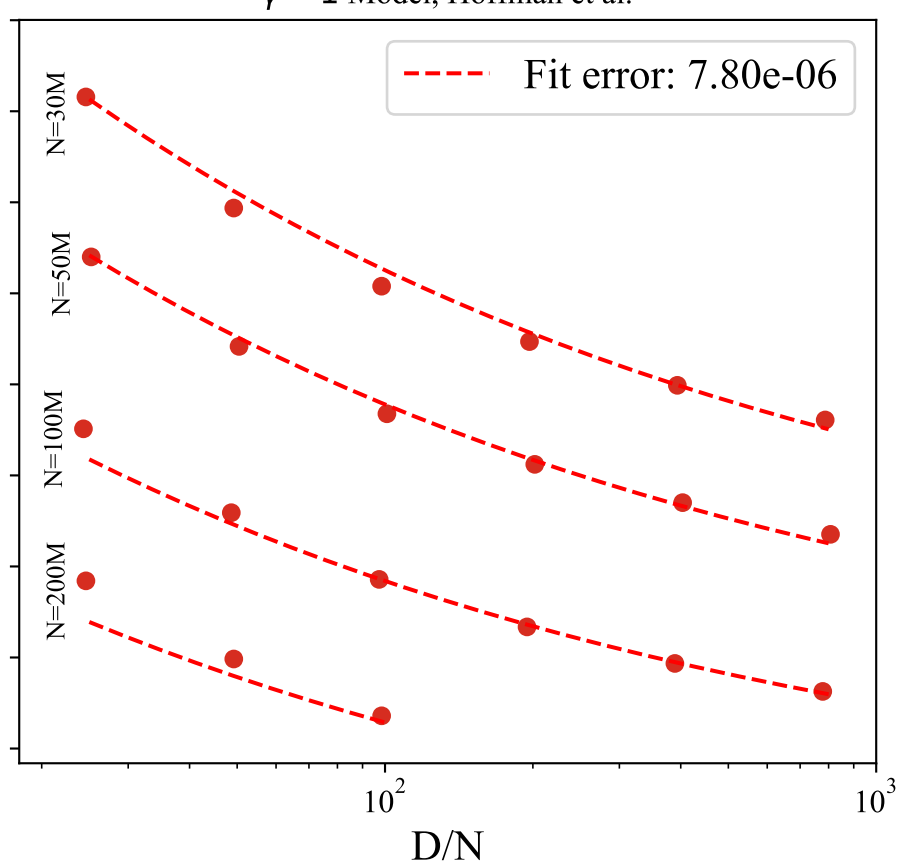 $\beta = 1$  Model, Kaplan et al.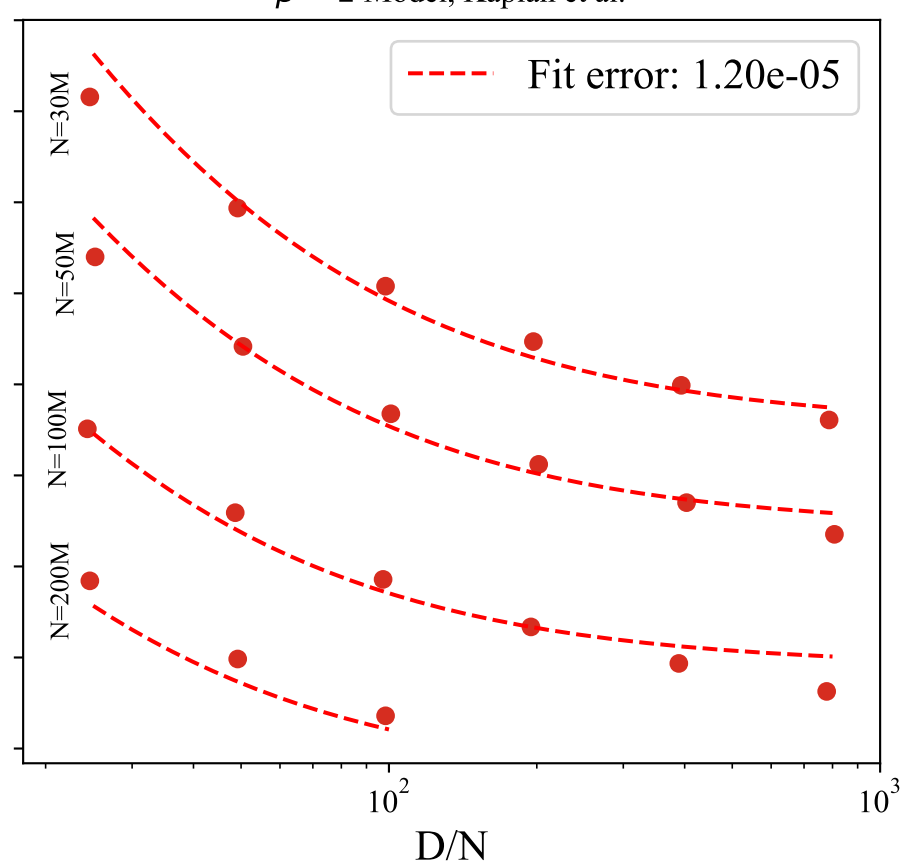

Supplement: supplementary_material [file laws.pdf › QuartetSupMat/figures/laws.pdf]

800M Model

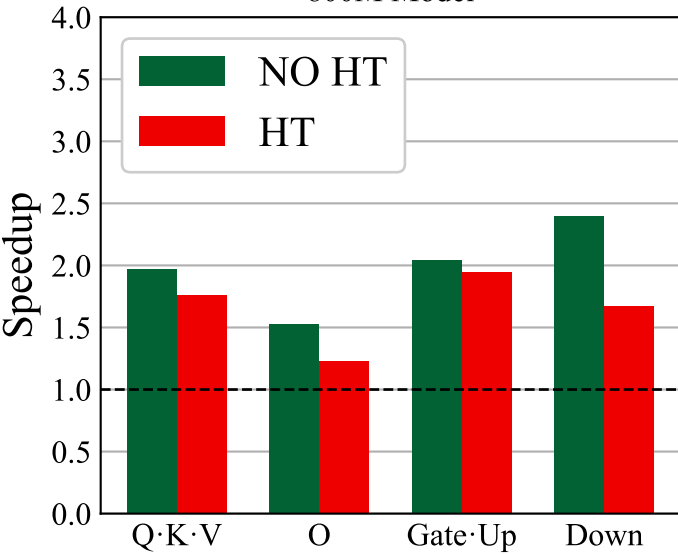

7B Model

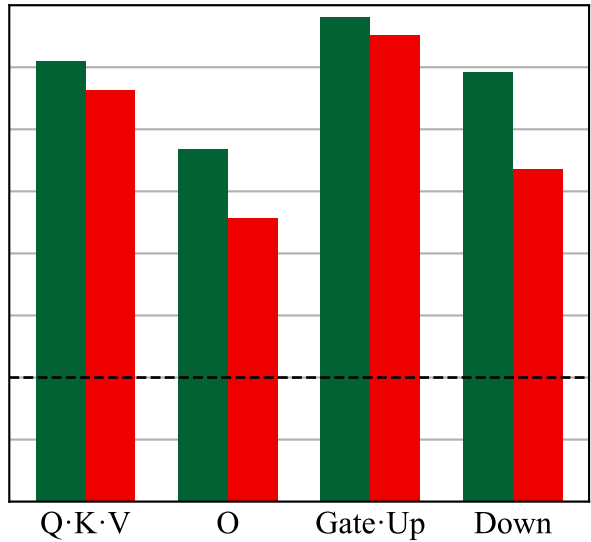

Supplement: supplementary_material [file layer_speedup.pdf › QuartetSupMat/figures/layer_speedup.pdf]

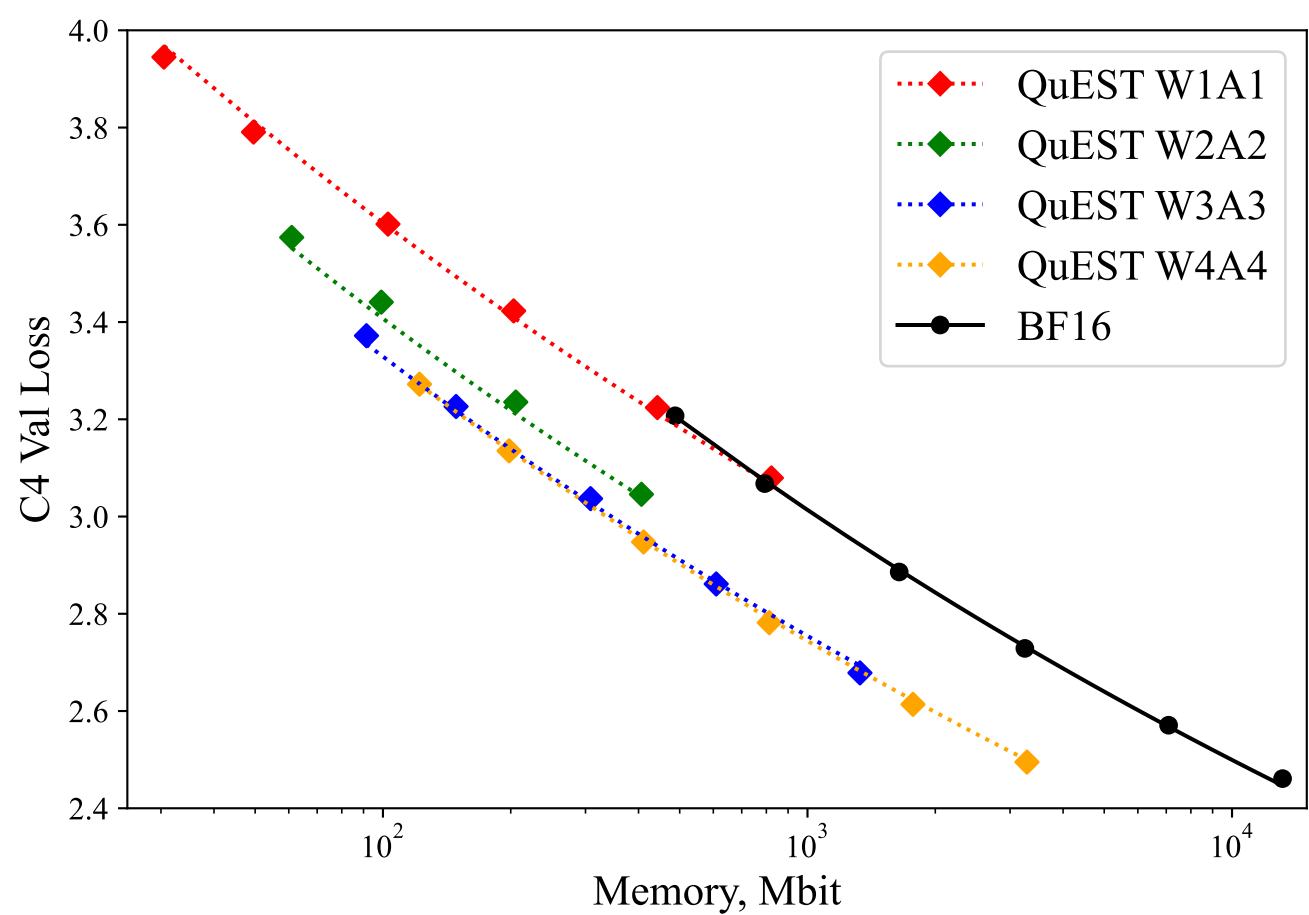

Supplement: supplementary_material [file main.pdf › QuartetSupMat/figures/main.pdf]

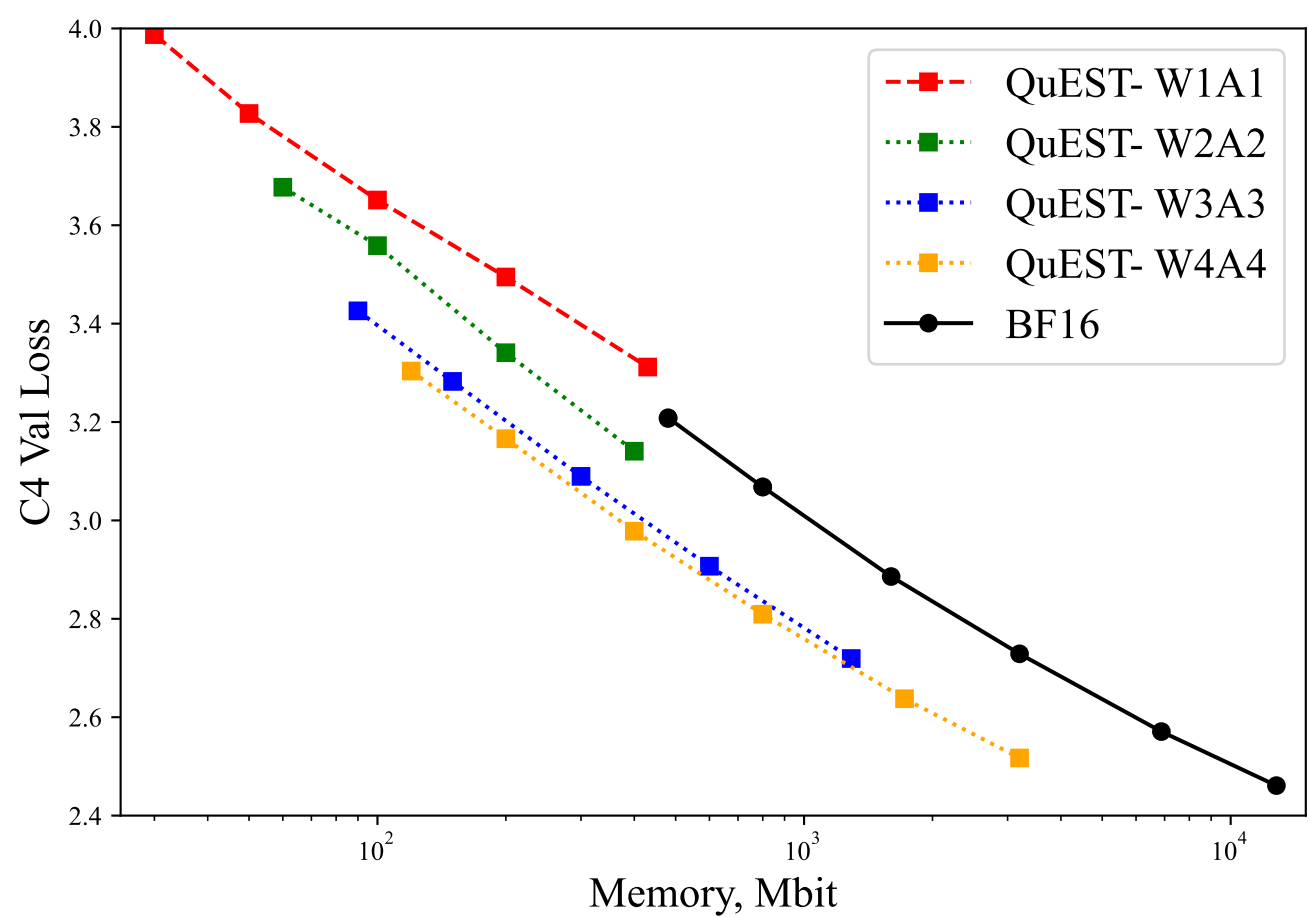

Supplement: supplementary_material [file main_ho_had.pdf › QuartetSupMat/figures/main_ho_had.pdf]

Fraction of Mask Elements

0.0005  
0.0004  
0.0003  
0.0002  
0.0001  
0.0000

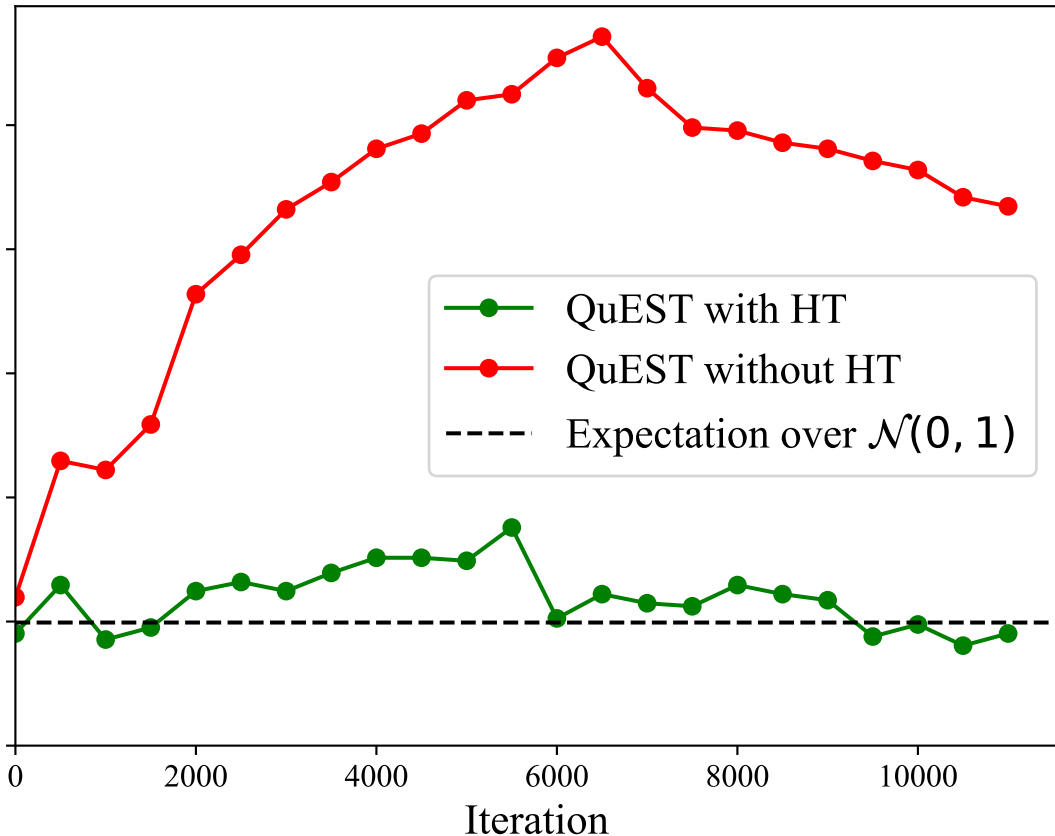

Supplement: supplementary_material [file mask_proportion.pdf › QuartetSupMat/figures/mask_proportion.pdf]

Without Hadamard Transform

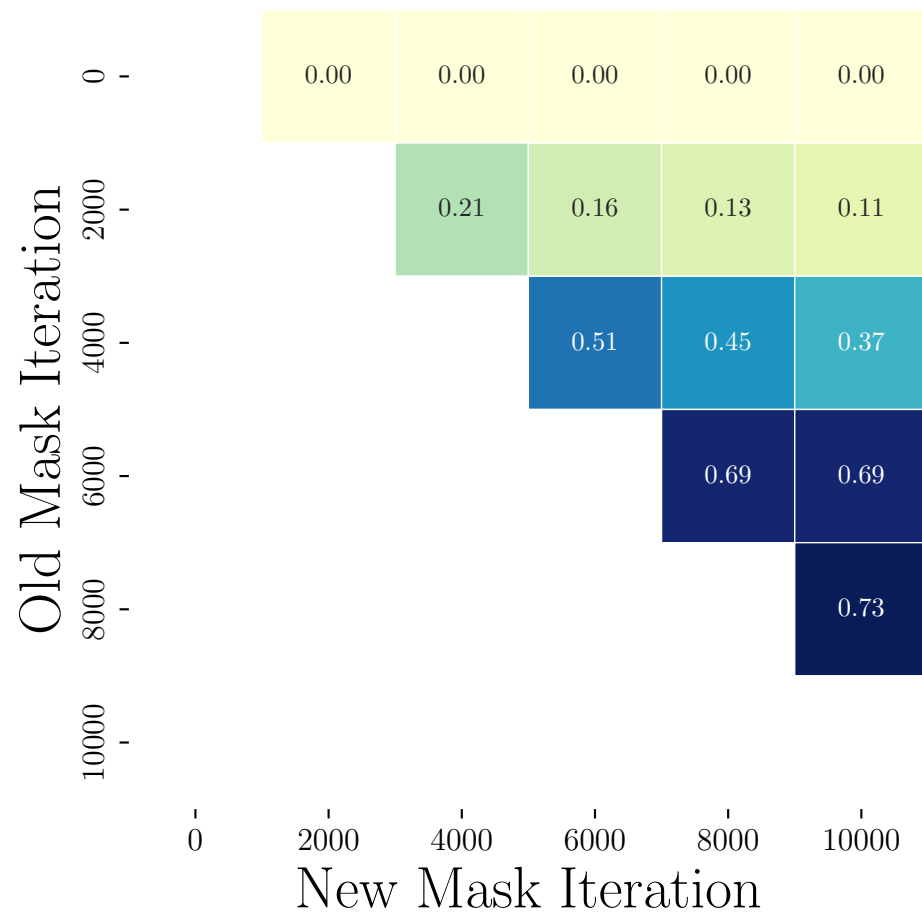

With Hadamard Transform

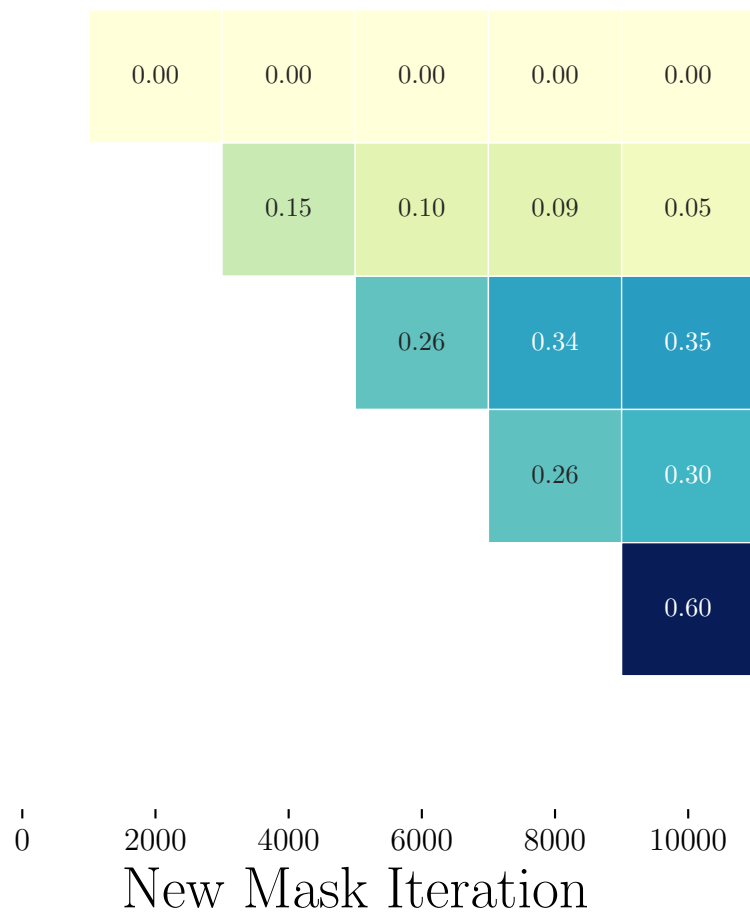

Supplement: supplementary_material [file masks.pdf › QuartetSupMat/figures/masks.pdf]

# Without Hadamard Transform

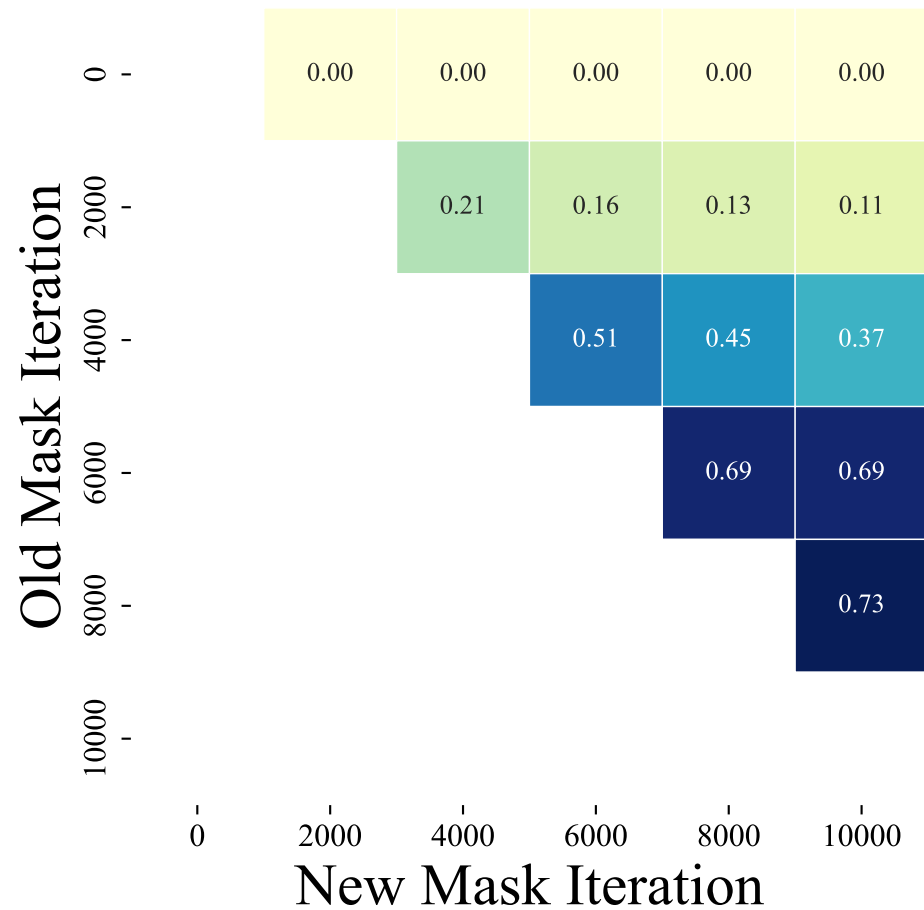

# With Hadamard Transform

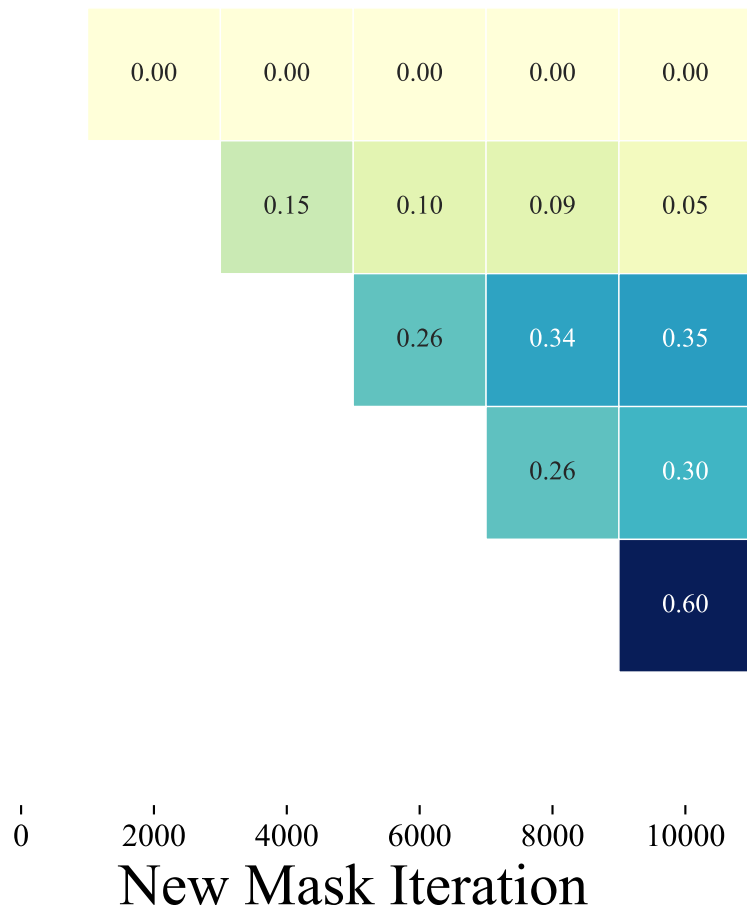

Supplement: supplementary_material [file masks_persistency.pdf › QuartetSupMat/figures/masks_persistency.pdf]

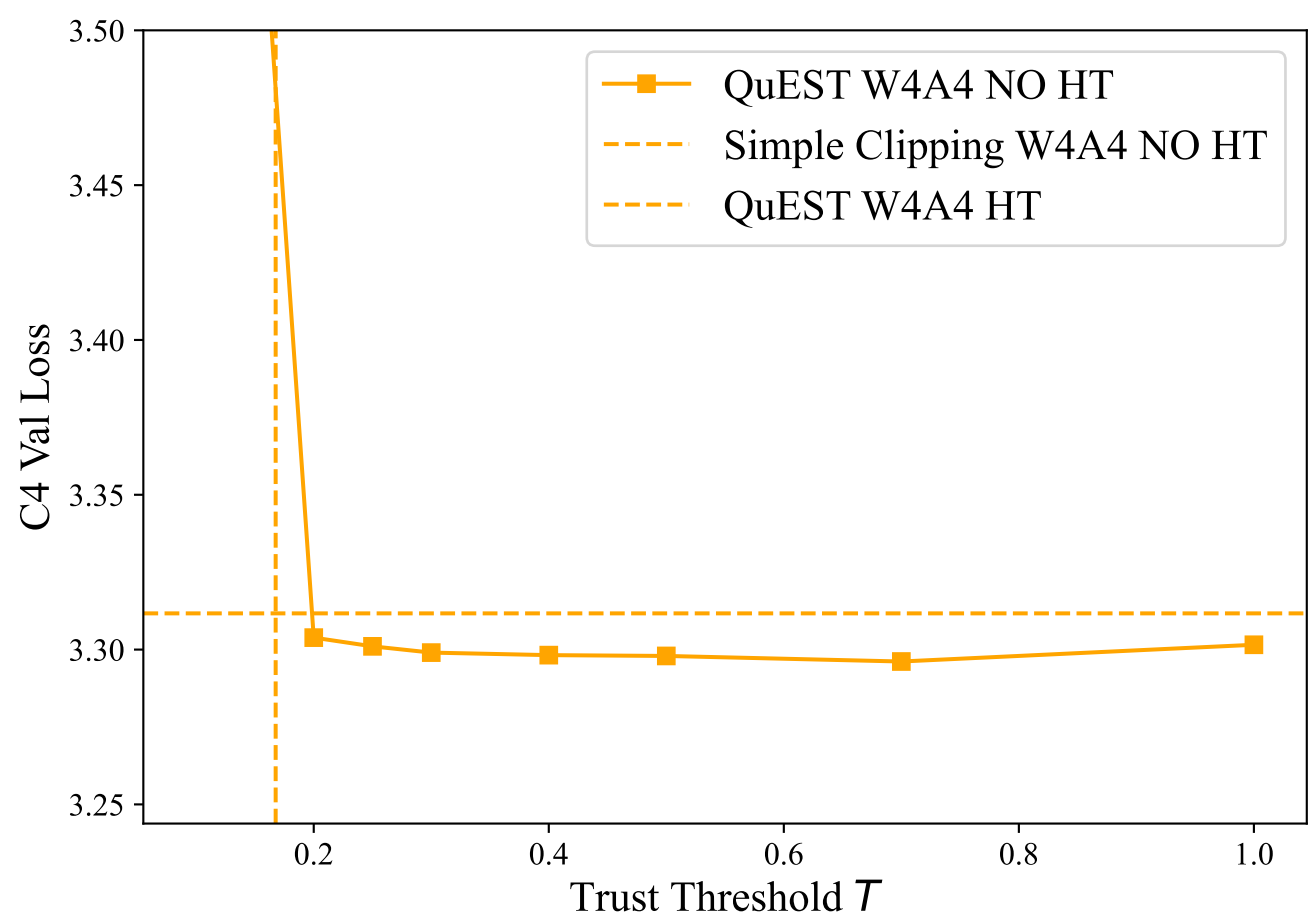

Supplement: supplementary_material [file trust_scale.pdf › QuartetSupMat/figures/trust_scale.pdf]

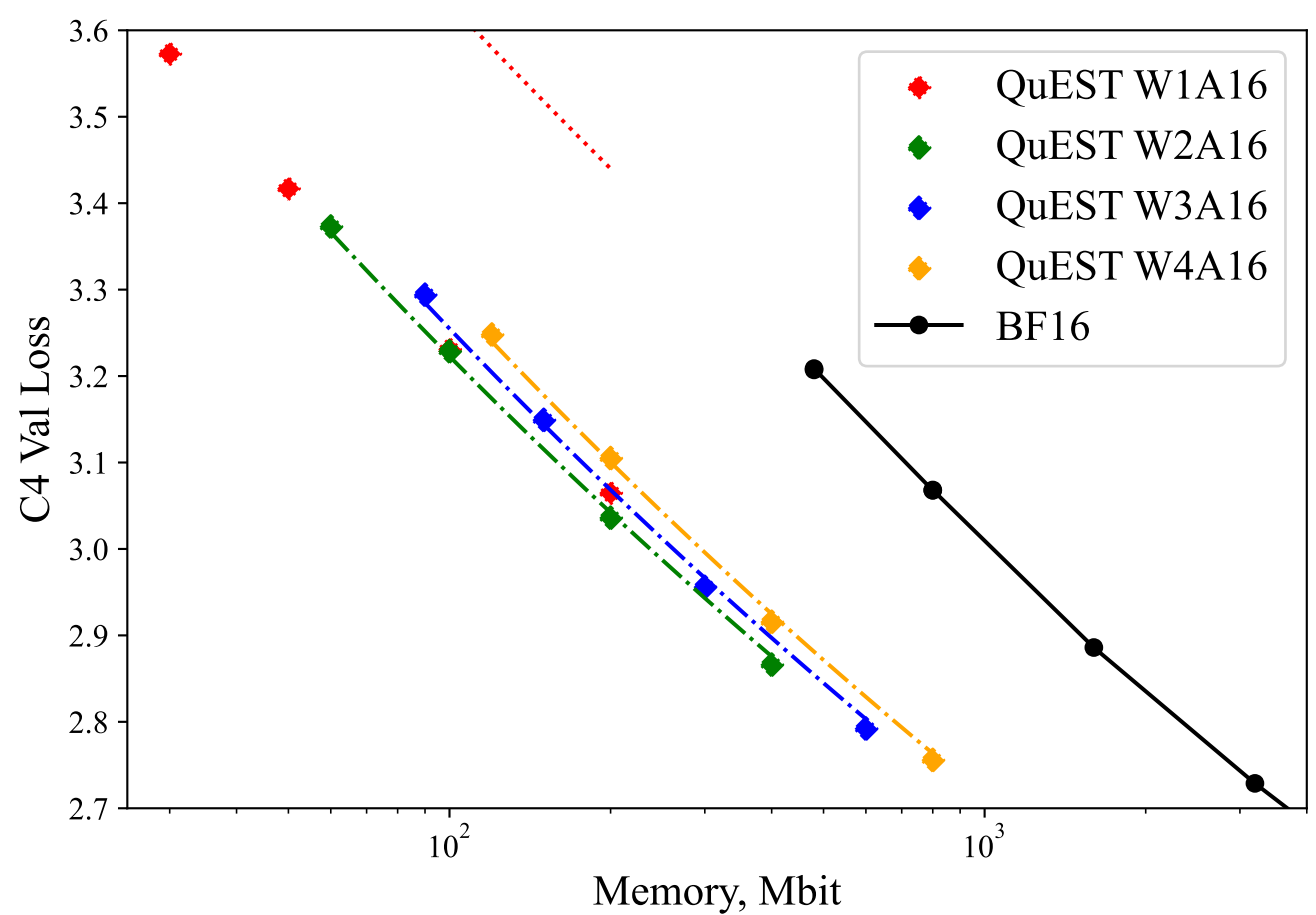

Supplement: supplementary_material [file weight_only.pdf › QuartetSupMat/figures/weight_only.pdf]
